# Supplementary material for: Redox Metabolism Measurement in Mammalian Cells and Tissues by LC-MS
Source: MDPI journal article supplement (doi:10.3390/metabo11050313), 2021-05-13
Supplement: s1 [file s1]

Archive with 8 entries (8 files):
- FIgure S1. Optimization of redox metabolites detection by LC-MS.pdf
- Figure S2. Optimization of redox metabolite detection in mammalian cells.pdf
- Figure S3. Application of the redox metabolite detection method for mammalian tissues.pdf
- Figure S4. Application of the redox metabolite detection method for profiling redox state following pharmacologic perturbations of redox balanc.pdf
- Table S1. Standards and retention times.xlsx
- Table S2. Column comparison.xlsx
- Table S3. Tissues buffer comparison.xlsx
- Table S4. K562 buffer comparison.xlsx
