# Supplementary material for: Redox Metabolism Measurement in Mammalian Cells and Tissues by LC-MS
Source: MDPI journal article supplement (doi:10.3390/metabo11050313), 2021-05-13
Supplement: s1 [file s1]

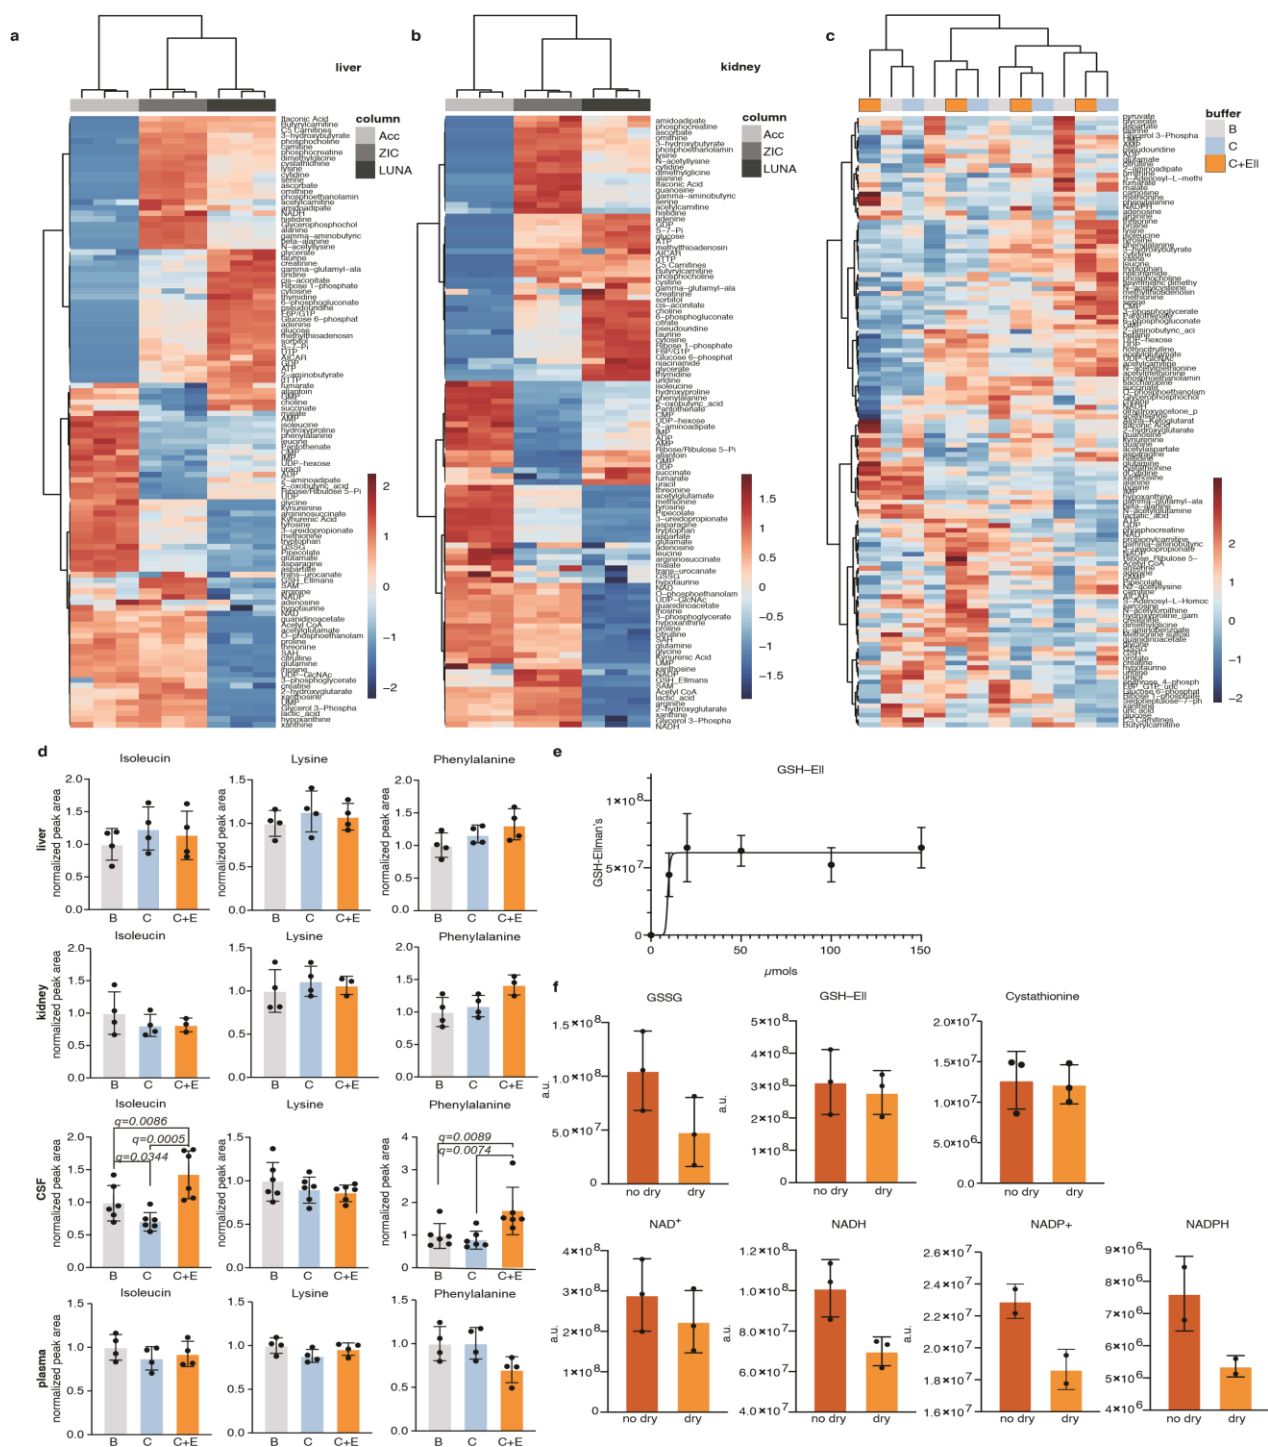

**Figure S3.** Application of the redox metabolite detection method for mammalian tissues; (a,b) LC-MS analysis of mouse liver (a) and kidney (b) using three chromatographic methods coupled to MS. Polar metabolites are presented in a heatmap for each organ; (c) Heatmap cluster analysis of polar metabolites detection in mouse liver samples extracted with three different buffers (B, C, C plus Ellman's); (d) Amino acid levels in the mouse liver, kidney, CSF, and plasma as detected by LC-MS following extraction in three buffers: B, C, C plus Ellman's; statistical significance was determined using Anova with correction for multiple comparisons and false discovery rate. Only significant q-values are indicated (except for GSH and GSH-Ell levels, which were excluded); (e) A big chunk of mouse liver was extracted in buffer C, split among indicated conditions and different concentrations of Ellman's reagent were added immediately. Raw peak areas for GSH-Ell were integrated and a non-linear model was used to fit the data. Presented are the average values and standard deviation of at least two independent experiments; (f) Mouse liver portions were extracted in buffer containing Ellman's reagent and split in half. One set of samples was dried before running for detection by LC-MS, while the other set was immediately analyzed by LC-MS, without prior drying and resuspension of the sample in water. Presented are the average values and standard deviation of three biological repeats.
