# Supplementary material for: Redox Metabolism Measurement in Mammalian Cells and Tissues by LC-MS
Source: MDPI journal article supplement (doi:10.3390/metabo11050313), 2021-05-13
Supplement: s1 [file s1]

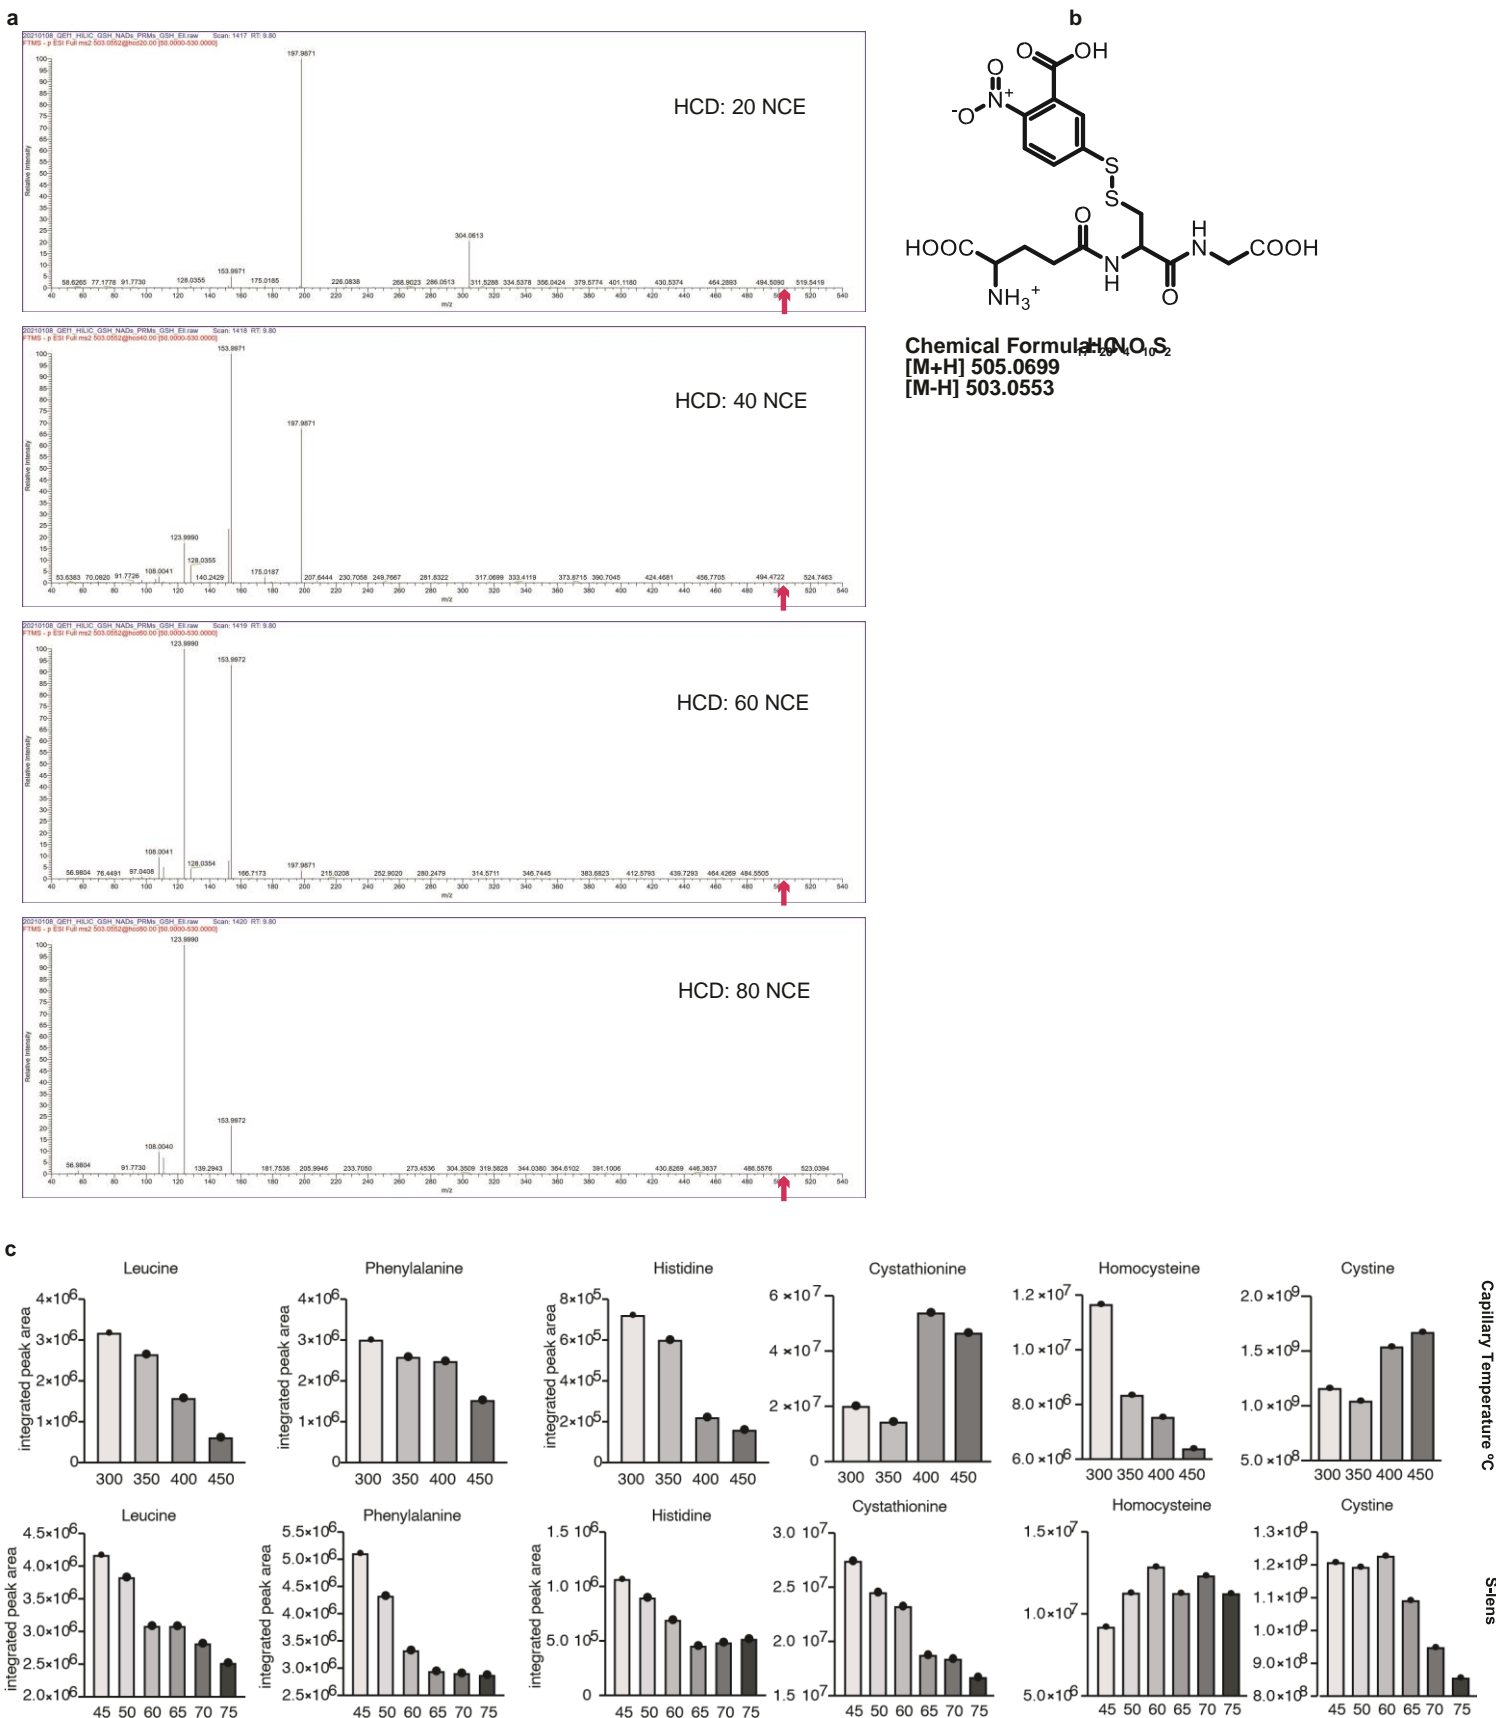

**Figure S1.** Optimization of redox metabolites detection by LC-MS (a) MS2 spectra for the indicated normalized collision energies (NCE) of the derivatization product of Ellman's with glutathione (GSH-Ell). Red arrow indicates mass of precursor; (b) Schematic of the chemical structure and theoretical exact mass of negative or positive ion of GSH-Ell; (c) Optimization of HESI parameters on orbitrap mass spectrometer for the indicated amino acids using ZIC-pHILIC chromatography and  $^{13}C^{15}N$  isotopically labeled standards. Graphs represent integrated areas of chromatographic peaks under changing parameters for capillary temperature or S-lens.
