# Supplementary material for: Redox Metabolism Measurement in Mammalian Cells and Tissues by LC-MS
Source: MDPI journal article supplement (doi:10.3390/metabo11050313), 2021-05-13
Supplement: s1 [file s1 › Table S2. Column comparison.xlsx]

## Sheet: 3 columns RAW data
Filename	1-methylnicotinamide	2,3-BPG_unc	2-aminobutyric_acid	2-hydroxybutyric_acid	2-hydroxyglutarate	2-oxoadipate_unc	2-oxobutyric_acid_unc	3-hydroxybutyric_acid	3-hydroxyisobutyric_acid	3-methyl-2-oxopentanoic_acid	3-phosphoglycerate	3-ureidopropionate	5-Hydroxyindole-3-Acetate_unc	6-phosphogluconate	acetoacetate	Acetyl CoA	acetylalanine	acetylaspartate	acetylcarnitine	acetylglutamate	acetylglycine	acetylmethionine	acetylserine	adenine	adenosine_unc	ADP-ribose_unc	ADP	AICAR	alanine-13C3-15N	alanine	allantoin	alpha-keto-isovalerate	Alpha-Ketoglutarate	Alpha-Lipoic Acid_unc	amidoadipate	AMP	anserine_unc	arginine-13C6-15N4	arginine	argininosuccinate_unc	ascorbate_unc	asparagine	aspartate-13C6-15N4	aspartate	asymmetric dimethylarginine (ADMA)	ATP	beta-alanine	betaine	biotin
20201009_QEF1_HILIC_liver_kidney_BP_blank_start1_20201010100637	N/F	N/F	N/F	N/F	N/F	N/F	N/F	N/F	N/F	N/F	1109512	N/F	N/F	N/F	N/F	N/F	N/F	N/F	N/F	N/F	N/F	N/F	N/F	N/F	N/F	N/F	N/F	N/F	N/F	N/F	N/F	N/F	N/F	N/F	N/F	N/F	N/F	158191	6646655	N/F	N/F	N/F	N/F	N/F	N/F	N/F	N/F	N/F	N/F
20201009_QEF1_HILIC_liver_kidney_BP_blank_start2_20201010103707	N/F	N/F	N/F	N/F	N/F	N/F	N/F	N/F	N/F	N/F	N/F	N/F	N/F	N/F	N/F	N/F	N/F	N/F	N/F	N/F	N/F	N/F	N/F	N/F	N/F	N/F	N/F	N/F	N/F	N/F	N/F	N/F	N/F	N/F	N/F	N/F	N/F	N/F	2265302	N/F	N/F	N/F	N/F	N/F	N/F	N/F	N/F	N/F	N/F
20201009_QEF1_HILIC_liver_kidney_BP419	N/F	N/F	10861597	10532525	273556828	N/F	2560846	12320919	2420234	N/F	7638783	10078857	N/F	470248	2725311	21387260	N/F	282672	2055368897	38815437	N/F	285718	4031302	32627523	734649858	N/F	38098266	370475	N/F	274939677	4080386	N/F	N/F	N/F	117995316	485265499	7651351	24261238	77434689	22728991	415792868	8824630	N/F	25703735	N/F	8592691	31424078	8277100588	N/F
20201009_QEF1_HILIC_liver_kidney_BP420	N/F	N/F	8939178	10293352	236389639	N/F	2055699	13399938	2516257	N/F	9536494	11999401	N/F	710730	2517106	15084950	N/F	N/F	2321584898	39497993	N/F	494453	4164188	34294608	1150673731	N/F	31074973	643652	N/F	267529371	5602740	N/F	N/F	N/F	354475215	602448565	6945979	21519845	34403855	15401056	422385400	7827988	153146	26441385	N/F	6093031	32175989	14766504096	N/F
20201009_QEF1_HILIC_liver_kidney_BP421	N/F	N/F	14403029	11125685	245753957	N/F	2326907	12156463	1317214	N/F	4230159	14762064	N/F	333957	2738238	16969795	N/F	111673	1504491311	33323775	N/F	200036	3366152	36074665	639605760	N/F	39659802	529705	N/F	189765884	2625483	N/F	N/F	N/F	39812331	325211126	5260105	28599538	71609557	16138235	237976719	6814025	239730	18477156	N/F	5782050	22495292	10147762114	N/F
20201009_QEF1_HILIC_liver_kidney_BP422	N/F	N/F	N/F	N/F	273999556	N/F	2310297	5304788	1042265	N/F	8153229	9149241	N/F	65749	2851955	2466623	N/F	201461	1415888618	1211073	N/F	238942	1303150	114057208	1286787373	N/F	16131590	170604	N/F	98713534	1227836	N/F	N/F	N/F	31344553	131513934	58794542	26672342	436297157	11924698	167374673	6011544	519745	135557531	N/F	2790078	4307627	6932487617	N/F
20201009_QEF1_HILIC_liver_kidney_BP423	N/F	N/F	N/F	N/F	261677621	N/F	1335703	4816157	1067542	N/F	6430541	8828538	N/F	44574	2284061	2643094	N/F	100010	1386782386	1088666	N/F	151248	1820431	108093825	1175370033	N/F	14822849	180981	N/F	99863176	992985	N/F	N/F	N/F	79501885	132188370	63025702	24269629	470495855	10218822	104798072	5346597	277606	158845806	N/F	2554913	4200913	4716198873	N/F
20201009_QEF1_HILIC_liver_kidney_BP424	N/F	N/F	N/F	N/F	254567325	N/F	2403109	6084483	1183864	N/F	6024814	9665333	N/F	85346	2601536	2526872	N/F	252513	1593852534	1246047	N/F	136292	1054578	116657343	925379958	N/F	15518384	181200	N/F	81518780	1380277	N/F	N/F	N/F	26991144	144955447	57963033	22976574	406051310	6724857	136355052	5880404	401382	166470024	N/F	2445027	4089573	7959372274	N/F
20201009_QEF1_HILIC_liver_kidney_BP431_pool1x_a	N/F	N/F	11769683	3290697	239362502	N/F	2212093	8701032	1671019	N/F	6895151	11145202	N/F	233037	2344446	10672593	N/F	146836	1724695693	19171141	2122361	281811	2496799	74005182	980396584	N/F	25574305	331685	N/F	161717694	2357025	N/F	N/F	N/F	113238282	262603758	31047739	21148611	232532460	13004757	150090421	6463152	153529	65378708	N/F	4623783	16895696	8912605690	N/F
20201009_QEF1_HILIC_liver_kidney_BP431_pool1x_b	N/F	N/F	7161832	N/F	245309770	N/F	1858333	10153001	861093	N/F	6710025	10144902	N/F	218331	2299248	9836427	N/F	123592	1685658906	19611812	1830328	232102	2212608	78251909	1000641452	N/F	25202962	366327	N/F	166394737	2363963	1384666	N/F	N/F	109725569	268255692	32889466	24478328	277895640	13653262	259785005	6756077	N/F	63946003	N/F	4528642	17339116	8891167765	N/F
20201009_QEF1_HILIC_liver_kidney_BP431_pool1x_c	N/F	N/F	11276489	2163622	249864005	N/F	1914925	8932398	1605286	N/F	6373925	11613286	N/F	260382	2700790	10662396	N/F	126465	1659221428	17629210	N/F	242986	2669367	77769719	1014335510	N/F	25614529	304325	N/F	161370115	2279239	N/F	N/F	N/F	116071931	272387520	34710011	25196878	276681259	14564193	285529732	6469330	N/F	66180489	N/F	4558920	14891384	8893715987	N/F
20201009_QEF1_HILIC_liver_kidney_BP432_pool03	N/F	N/F	4376367	N/F	105633414	N/F	879075	2940385	618927	N/F	1103282	2813665	N/F	32054	767575	2787663	N/F	127005	539548166	6479998	N/F	N/F	836317	25644962	362095206	N/F	7533302	98622	N/F	51395127	1989856	N/F	N/F	N/F	33793619	64201708	5054294	9527537	106571091	4194738	108974885	2054499	223595	49188347	N/F	1249885	5353114	2990785046	N/F
20201009_QEF1_HILIC_liver_kidney_BP433_pool01x	N/F	N/F	N/F	N/F	37736869	N/F	N/F	695165	122642	N/F	N/F	838624	N/F	N/F	324060	737414	N/F	N/F	174525736	2084646	N/F	N/F	292929	7749929	126375080	N/F	2346387	29726	N/F	15569045	1785042	N/F	N/F	N/F	5959197	17907048	582962	3427731	40264950	189342	27378124	528233	N/F	14010317	N/F	315698	1420894	935072818	N/F
20201009_QEF1_HILIC_liver_kidney_BP433_pool01x_a	N/F	N/F	N/F	N/F	34463005	N/F	N/F	946471	250406	N/F	N/F	957272	N/F	N/F	N/F	775192	N/F	N/F	194580041	2005772	N/F	N/F	290621	7574140	124358413	N/F	2295532	26601	N/F	16115437	1484282	N/F	N/F	N/F	6530274	19063953	690578	3008620	36630257	199123	11569913	471266	N/F	14936377	N/F	347395	1415673	1034089520	N/F
Filename	1-methylnicotinamide_unc	2,3-BPG_unc	2-aminoadipate	2-aminobutyric_acid	2-hydroxyglutarate	2-oxoadipate_unc	2-oxobutyric_acid	3-methyl-2-oxobutyrate	3-methyl-2-oxopentanoic_acid	3-phosphoglycerate	3-ureidopropionate_unc	5-Hydroxyindole-3-Acetate_unc	6-phosphogluconate unc	acetoacetate_unc	Acetyl CoA_unc	acetylalanine	acetylaspartate_MS2	acetylcarnitine	acetylglutamate	acetylglutamine	acetylglycine	acetylmethionine	acetylserine_unc	adenine_unc	adenosine_unc	ADP-ribose_unc	ADP	AICAR unc	alanine-13C3-15N	alanine	ALA_HyP_114	allantoin	Alpha-Ketoglutarate	Alpha-Lipoic Acid_unc	AMP	anserine_unc	arginine-13C6,15N4	arginine	argininosuccinate	ascorbate_unc	asparagine	aspartate-13C6-15N4	aspartate	asymmetric dimethylarginine (ADMA)	ATP	beta-alanine	betaine	biotin	Butyrylcarnitine unc
20201009_QEF1_Acc_liver_kidney_BP_blank_end1	N/F	N/F	N/F	N/F	N/F	N/F	N/F	4918661	N/F	N/F	N/F	N/F	N/F	N/F	N/F	N/F	N/F	N/F	N/F	N/F	N/F	N/F	N/F	N/F	N/F	N/F	N/F	N/F	N/F	N/F	N/F	N/F	N/F	N/F	N/F	N/F	N/F	N/F	N/F	N/F	N/F	N/F	N/F	N/F	N/F	N/F	N/F	N/F	N/F
20201009_QEF1_Acc_liver_kidney_BP_blank_end2	N/F	N/F	N/F	N/F	N/F	N/F	N/F	N/F	N/F	N/F	N/F	N/F	N/F	N/F	N/F	N/F	N/F	N/F	N/F	N/F	N/F	N/F	N/F	N/F	N/F	N/F	N/F	N/F	N/F	N/F	N/F	N/F	N/F	N/F	N/F	N/F	N/F	N/F	N/F	N/F	N/F	N/F	N/F	N/F	N/F	N/F	N/F	N/F	N/F
20201009_QEF1_Acc_liver_kidney_BP_blank_start1	N/F	N/F	N/F	N/F	N/F	N/F	N/F	N/F	N/F	N/F	N/F	N/F	N/F	N/F	N/F	N/F	N/F	N/F	N/F	N/F	N/F	N/F	N/F	N/F	N/F	N/F	N/F	N/F	N/F	N/F	N/F	N/F	N/F	N/F	N/F	N/F	N/F	232017409	N/F	N/F	N/F	N/F	N/F	N/F	N/F	N/F	N/F	N/F	N/F
20201009_QEF1_Acc_liver_kidney_BP_blank_start2	N/F	N/F	N/F	N/F	N/F	N/F	N/F	N/F	N/F	N/F	N/F	N/F	N/F	N/F	N/F	N/F	N/F	N/F	N/F	N/F	N/F	N/F	N/F	N/F	N/F	N/F	N/F	N/F	N/F	N/F	N/F	N/F	N/F	N/F	N/F	N/F	N/F	6736527	N/F	N/F	N/F	N/F	N/F	N/F	N/F	N/F	N/F	N/F	N/F
20201009_QEF1_Acc_liver_kidney_BP407	N/F	N/F	393939578	N/F	79049411	N/F	52786908	N/F	N/F	7693520	106236526	4584461	N/F	N/F	17723772	N/F	N/F	887613214	31090340	126192645	N/F	N/F	N/F	N/F	718527705	N/F	104575017	N/F	N/F	N/F	N/F	23354397	N/F	N/F	1284836389	N/F	7128007	27442180	106525872	23127915	97558843	N/F	538409117	N/F	N/F	N/F	4052404843	N/F	3722928
20201009_QEF1_Acc_liver_kidney_BP408	N/F	N/F	987860360	N/F	120793098	N/F	61466977	N/F	N/F	12863326	104248516	5841681	N/F	N/F	19730263	N/F	N/F	1420369845	34457874	151012606	N/F	N/F	N/F	N/F	1449816854	N/F	126182996	N/F	N/F	N/F	N/F	27014875	N/F	N/F	1656485249	N/F	9608016	6393057	109340580	N/F	104248516	N/F	631440816	N/F	N/F	N/F	11034853791	N/F	N/F
20201009_QEF1_Acc_liver_kidney_BP409	N/F	N/F	82789663	N/F	66398514	N/F	44521737	N/F	N/F	N/F	54954325	2337488	N/F	N/F	12304805	N/F	N/F	505143344	19927073	69429761	N/F	N/F	N/F	N/F	486346851	N/F	83605760	N/F	N/F	N/F	N/F	29037577	N/F	N/F	907709347	N/F	7300976	13617283	42628910	N/F	49481139	N/F	341811042	N/F	N/F	N/F	4432179401	N/F	N/F
20201009_QEF1_Acc_liver_kidney_BP410	N/F	N/F	132835667	N/F	124097717	N/F	53922936	N/F	N/F	6020096	189376444	2592444	N/F	N/F	1875635	N/F	N/F	640358753	3067160	22943327	N/F	N/F	N/F	N/F	1213392885	N/F	49539705	N/F	N/F	N/F	N/F	18772084	N/F	N/F	884896523	N/F	12088884	244137681	53088395	11769552	152445691	N/F	1574806735	N/F	N/F	N/F	3429788782	N/F	3921396
20201009_QEF1_Acc_liver_kidney_BP411	N/F	N/F	403635159	N/F	180995496	N/F	43564230	N/F	N/F	9620116	223731284	2988380	N/F	N/F	2517424	N/F	N/F	808756836	4518960	26729023	N/F	N/F	N/F	N/F	1711142230	N/F	57873938	N/F	N/F	N/F	N/F	18988345	N/F	N/F	1059534770	N/F	12264980	269150453	60276670	N/F	179718556	N/F	2458843242	N/F	N/F	N/F	3246934150	N/F	4386686
20201009_QEF1_Acc_liver_kidney_BP412	N/F	N/F	95006405	N/F	210389203	N/F	70978504	N/F	N/F	9757552	231439874	3449777	N/F	N/F	2906132	N/F	N/F	1038445713	3502726	34579191	N/F	N/F	N/F	N/F	1416506266	N/F	73538984	N/F	N/F	N/F	N/F	20872612	N/F	N/F	1367157782	N/F	15638647	334449841	36004724	N/F	215048377	N/F	3038713054	N/F	N/F	N/F	6298347206	N/F	2222022
20201009_QEF1_Acc_liver_kidney_BP425_pool1x_a	N/F	N/F	158314271	N/F	109824432	N/F	77622247	N/F	182304757	N/F	128261478	1694417	N/F	N/F	8134788	N/F	N/F	745581472	10286269	62564769	N/F	N/F	N/F	N/F	931180184	N/F	73931726	N/F	N/F	N/F	1139155	31128960	N/F	N/F	1074898071	N/F	9889428	90332540	41785980	N/F	104857080	N/F	1240160442	N/F	N/F	N/F	4767387571	N/F	1333804
20201009_QEF1_Acc_liver_kidney_BP425_pool1x_b	N/F	N/F	391529483	N/F	128881759	N/F	70028307	N/F	N/F	10393367	146745405	4201410	N/F	N/F	8661353	N/F	N/F	815852451	15857968	74543788	N/F	N/F	N/F	N/F	1154533335	N/F	78157894	N/F	N/F	N/F	N/F	34354784	N/F	N/F	1244821598	N/F	10954598	149522484	71177504	N/F	139573430	N/F	1450640650	N/F	N/F	N/F	5183307812	N/F	4192187
20201009_QEF1_Acc_liver_kidney_BP425_pool1x_c	N/F	N/F	337955461	N/F	73616046	N/F	54542688	N/F	N/F	7035084	103853706	2061593	N/F	N/F	6907444	N/F	N/F	592236736	12968629	53326753	N/F	N/F	N/F	N/F	884307913	N/F	60962590	N/F	N/F	N/F	N/F	20930610	N/F	N/F	935031821	N/F	5622394	77789128	56878628	34393025	88227328	N/F	989821998	N/F	N/F	N/F	3611915649	1477949	2808592
20201009_QEF1_Acc_liver_kidney_BP426_pool03x	N/F	N/F	126792510	N/F	35045719	N/F	12550045	N/F	N/F	N/F	27726458	712944	N/F	N/F	1365025	N/F	N/F	168154775	3589580	14068771	N/F	N/F	N/F	N/F	271276630	N/F	13394816	N/F	N/F	N/F	N/F	16688970	N/F	N/F	278871267	N/F	1205747	28035269	17351293	N/F	22696994	N/F	248616276	N/F	N/F	N/F	1069222987	N/F	367295
20201009_QEF1_Acc_liver_kidney_BP427_pool01x	N/F	N/F	63067977	N/F	19949220	N/F	3373857	N/F	N/F	N/F	12074617	N/F	N/F	N/F	396443	N/F	N/F	56690955	987435	7452750	N/F	N/F	N/F	N/F	87157140	N/F	4160211	N/F	N/F	N/F	N/F	8109810	N/F	N/F	149166320	N/F	N/F	8336864	22439444	N/F	12123451	N/F	114047978	N/F	N/F	N/F	463927389	999251	N/F
20201009_QEF1_Acc_liver_kidney_BP427_pool01x_a	N/F	N/F	61682018	N/F	24993705	N/F	8481327	N/F	N/F	N/F	13890543	N/F	N/F	N/F	385294	N/F	N/F	60117578	N/F	5055807	N/F	N/F	N/F	N/F	104693825	N/F	4251180	N/F	N/F	N/F	N/F	5955035	N/F	N/F	188007313	N/F	N/F	8010683	21909110	N/F	11278206	N/F	157018897	N/F	N/F	N/F	530912669	N/F	N/F
Filename	2-aminoadipate	2-aminobutyric_acid_unc	2-hydroxybutyric_acid	2-hydroxyglutarate	2-oxoadipate_unc	2-oxobutyric_acid_unc	3-hydroxybutyric_acid	3-hydroxyisobutyric_acid	3-methyl-2-oxobutyrate_unc	3-methyl-2-oxopentanoic_acid_unc	3-phosphoglycerate_unc	3-ureidopropionate	6-phosphogluconate	acetoacetate	Acetyl CoA	acetylalanine	acetylaspartate	acetylcarnitine	acetylglutamate	acetylglutamine	acetylglycine_unc	acetylmethionine	acetylserine	adenine	adenosine_unc	ADP-ribose_unc	ADP	AICAR	alanine-13C3-15N	alanine	ALA_114	allantoin	Alpha-Ketoglutarate	amidoadipate	AMP	anserine_unc	arginine-13C6,15N4	arginine	argininosuccinate	ascorbate_unc	asparagine	aspartate-13C6-15N4	aspartate	asymmetric dimethylarginine (ADMA)	ATP	beta-alanine	betaine	biliverdin	biotin
20201009_QEF2_LUNA_liver_kidney_blank_end1	N/F	N/F	N/F	2777257	N/F	N/F	N/F	N/F	N/F	N/F	N/F	N/F	N/F	N/F	N/F	N/F	N/F	N/F	N/F	N/F	N/F	N/F	N/F	N/F	N/F	N/F	158479	N/F	N/F	N/F	N/F	N/F	N/F	N/F	182468	N/F	N/F	N/F	N/F	N/F	N/F	N/F	3631173	N/F	N/F	N/F	N/F	N/F	N/F
20201009_QEF2_LUNA_liver_kidney_blank_end2	N/F	N/F	N/F	2300793	N/F	N/F	N/F	N/F	N/F	N/F	N/F	N/F	N/F	N/F	N/F	N/F	N/F	N/F	N/F	N/F	N/F	N/F	N/F	N/F	N/F	N/F	N/F	N/F	N/F	N/F	N/F	N/F	N/F	N/F	N/F	N/F	N/F	N/F	N/F	N/F	N/F	N/F	3158120	N/F	N/F	N/F	N/F	N/F	N/F
20201009_QEF2_LUNA_liver_kidney_blank_start1	2805903	N/F	57871328	67957789	N/F	N/F	N/F	N/F	N/F	N/F	2588148	N/F	195686	N/F	N/F	N/F	N/F	315258	N/F	N/F	N/F	N/F	N/F	N/F	N/F	N/F	14750461	N/F	N/F	N/F	N/F	N/F	N/F	2695906	71230516	N/F	N/F	N/F	2354307	N/F	N/F	N/F	12043301	N/F	N/F	N/F	N/F	N/F	N/F
20201009_QEF2_LUNA_liver_kidney_blank_start2	N/F	N/F	N/F	14683256	N/F	N/F	N/F	N/F	N/F	N/F	N/F	N/F	N/F	N/F	N/F	N/F	N/F	N/F	N/F	N/F	N/F	N/F	N/F	N/F	N/F	N/F	275481	N/F	N/F	N/F	N/F	N/F	2334394	N/F	3170566	N/F	N/F	N/F	N/F	N/F	N/F	N/F	11798104	N/F	N/F	N/F	N/F	N/F	N/F
20201009_QEF2_LUNA_liver_kidney_BP413	35584152	35076847	6738690	12984597	2176236	14731488	3355575	N/F	N/F	N/F	6286414	N/F	3633649	N/F	N/F	N/F	N/F	980917586	N/F	N/F	N/F	N/F	N/F	114187018	534615610	N/F	64024338	361549	N/F	30476528	N/F	36017999	N/F	35584152	397069936	N/F	351213	2218165	7012433	107792779	1986703	N/F	16326400	4435498	16248470	4031399	2505444594	N/F	N/F
20201009_QEF2_LUNA_liver_kidney_BP414	106395704	39335573	7765867	22177255	2665155	13360180	5460520	N/F	N/F	N/F	9298965	N/F	5493826	N/F	N/F	N/F	N/F	1373680736	N/F	N/F	N/F	N/F	N/F	202758104	932005194	N/F	60825394	1378275	N/F	33621270	N/F	49081413	N/F	106395704	463112195	N/F	228805	672558	4435052	126098684	2221078	N/F	19581685	4633481	13619970	5683298	4796105895	N/F	N/F
20201009_QEF2_LUNA_liver_kidney_BP415	12913800	34503587	9057469	15116884	2286581	13119704	5231009	N/F	N/F	N/F	5849988	N/F	2570980	N/F	N/F	N/F	N/F	763937469	N/F	N/F	N/F	N/F	N/F	98230877	473836439	N/F	76273347	923175	N/F	20234138	N/F	26903111	N/F	12913800	346809889	N/F	324830	2246170	5447901	50276798	1213824	N/F	12338679	2696278	12629260	4074552	3429151873	N/F	N/F
20201009_QEF2_LUNA_liver_kidney_BP416	14570521	2777945	N/F	27779006	1514360	7398220	2835280	N/F	N/F	N/F	8485852	N/F	489491	N/F	N/F	N/F	N/F	935027286	N/F	N/F	N/F	N/F	N/F	268451463	1248398100	N/F	34148629	179609	N/F	4277119	N/F	22452791	N/F	14570521	332693925	N/F	1893492	38728214	7731295	39983504	1283598	N/F	53907435	1974228	6918932	N/F	2971461032	N/F	N/F
20201009_QEF2_LUNA_liver_kidney_BP417	36102537	3846689	N/F	27549222	2109547	6530388	2358121	N/F	N/F	N/F	12132027	N/F	694560	N/F	N/F	N/F	N/F	978349643	N/F	N/F	N/F	N/F	N/F	242766818	1165028898	N/F	33680958	387260	N/F	4374292	N/F	16384740	N/F	36102537	385596973	N/F	1565964	32266600	5703623	12050025	1065849	N/F	77485686	N/F	6625689	N/F	2146779819	N/F	N/F
20201009_QEF2_LUNA_liver_kidney_BP418	12476173	3338245	N/F	19247237	2119263	4806002	2593783	N/F	N/F	N/F	5011460	N/F	584799	N/F	N/F	N/F	N/F	1170263917	N/F	N/F	N/F	N/F	N/F	221428983	1028627601	N/F	33863776	N/F	N/F	5350247	N/F	23444727	N/F	12476173	358755492	N/F	2405309	51708607	5122920	39443196	1575110	N/F	74603565	2341599	7103242	N/F	3411389316	N/F	N/F
20201009_QEF2_LUNA_liver_kidney_BP419_pool1x_a	33371430	16752604	3611071	26731834	2636616	9920427	3198059	N/F	N/F	N/F	15383593	N/F	3537000	N/F	N/F	N/F	N/F	880424849	N/F	N/F	N/F	N/F	N/F	139913535	667990363	N/F	55649314	761158	N/F	13213947	N/F	26495953	N/F	33371430	458086826	N/F	N/F	7178197	3959413	21389330	1267273	N/F	57565988	N/F	9035842	724247	3044517246	N/F	N/F
20201009_QEF2_LUNA_liver_kidney_BP419_pool1x_b	38538330	17761747	3691608	19662521	2014659	10679487	3803044	N/F	N/F	N/F	7172998	N/F	1886434	N/F	N/F	N/F	N/F	962035869	N/F	N/F	N/F	N/F	N/F	186951031	880853210	N/F	46119906	632466	N/F	14464127	N/F	27389921	N/F	38538330	351617018	N/F	585331	19313173	5773689	50920241	1258704	N/F	41418245	2664465	9938442	1700775	3273519021	N/F	N/F
20201009_QEF2_LUNA_liver_kidney_BP419_pool1x_c	37545464	16645556	2822793	17833311	1846277	8781778	4037827	N/F	N/F	N/F	4882190	N/F	1498149	N/F	N/F	N/F	N/F	991694362	N/F	N/F	N/F	N/F	N/F	198519112	909831567	N/F	44776677	608865	N/F	14582942	N/F	26797630	N/F	37545464	334787319	N/F	1637786	25275875	6849429	58454526	1658034	N/F	38527969	3449770	9709552	1799603	3215077782	N/F	N/F
20201009_QEF2_LUNA_liver_kidney_BP420_pool03x	11681165	7183726	1836503	10362184	891954	3391439	2085986	N/F	N/F	N/F	2074935	N/F	520832	N/F	N/F	N/F	N/F	325972437	N/F	N/F	N/F	N/F	N/F	68422192	315811403	N/F	16978413	128694	N/F	4284450	N/F	9529057	N/F	11681165	122168772	N/F	N/F	3032494	906278	11064376	N/F	N/F	21251226	N/F	3675247	1502967	1233523915	N/F	N/F
20201009_QEF2_LUNA_liver_kidney_BP421_pool01x	1590946	641965	N/F	3401374	224837	N/F	N/F	N/F	N/F	N/F	374868	N/F	N/F	N/F	N/F	N/F	N/F	90787093	N/F	N/F	N/F	N/F	N/F	16454126	89414957	N/F	4564892	N/F	N/F	N/F	N/F	2150972	N/F	1590946	32901459	N/F	N/F	307059	N/F	N/F	N/F	N/F	20321023	N/F	606473	N/F	381159968	N/F	N/F
20201009_QEF2_LUNA_liver_kidney_BP421_pool01x_a	1872951	N/F	N/F	6449612	253817	N/F	N/F	N/F	N/F	N/F	1268609	N/F	127867	N/F	N/F	N/F	N/F	84538408	N/F	N/F	N/F	N/F	N/F	11351628	69992051	N/F	5598510	N/F	N/F	N/F	N/F	2048166	N/F	1872951	59874639	N/F	N/F	N/F	N/F	N/F	N/F	N/F	38126126	N/F	460983	N/F	374618472	N/F	N/F
[truncated: 168 more columns]

## Sheet: normalized and combined data
Filename	Group	2-aminoadipate	2-aminobutyric_acid	2-hydroxyglutarate	2-oxobutyric_acid	3-hydroxybutyric_acid	3-hydroxyisobutyric_acid	3-phosphoglycerate	3-ureidopropionate	5-Hydroxyindole-3-Acetate	6-phosphogluconate	acetoacetate	acetylalanine	Acetyl CoA	acetylaspartate	acetylcarnitine	acetylglutamate	acetylglutamine	acetylmethionine	acetylserine	adenine	adenosine	ADP	AICAR	alanine	allantoin	amidoadipate	AMP	anserine	arginine	argininosuccinate	ascorbate	asparagine	asymmetric dimethylarginine (ADMA)	aspartate	ATP	beta-alanine	betaine	Butyrylcarnitine	C5 Carnitines	cAMP	carnitine	carnosine	CDP	choline	cis-aconitate	citrate	citrulline	CMP
20201009_QEF1_HILIC_liver_kidney_BP419	ZIC_liver		8.79645e+06	221544714	2.07395e+06	9.97831e+06	1.96007e+06	6.1864e+06	8.16254e+06		380838	2.20714e+06		1.73208e+07	228927	1664575942	3.14354e+07		231394	3.26482e+06	2.6424e+07	5.94969e+08	3.08545e+07	300036	2.22665e+08	3.30457e+06	9.55605e+07	3.93001e+08	6.19658e+06	6.27118e+07	1.84075e+07	3.36737e+08	7.14678e+06		2.08166e+07	6.95894e+06	2.54493e+07	6703352632	3.14952e+08	9.52841e+07	1.46875e+06	2111969889	3.00284e+06	86736	2.15226e+07	1.19625e+06	1.23285e+07	7.88624e+07	1.46792e+06
20201009_QEF1_HILIC_liver_kidney_BP420	ZIC_liver		6.84543e+06	1.81022e+08	1.57421e+06	1.02614e+07	1.92689e+06	7.30284e+06	9.18888e+06		544261	1.92754e+06		1.15517e+07		1777818889	3.02467e+07		378641	3.18884e+06	26262060	8.81161e+08	23796534	492895	2.04868e+08	4.29046e+06	2.71449e+08	4.61342e+08	5.31908e+06	2.63457e+07	1.17938e+07	3.23453e+08	5.9945e+06		2.02482e+07	4.66591e+06	2.46397e+07	11307865554	3.0261e+08	8.01825e+07	1.09772e+06	2137943682	3.24634e+06	61257.7	2.65069e+07	1.18313e+06		6.50908e+07	1.3937e+06
20201009_QEF1_HILIC_liver_kidney_BP421	ZIC_liver		1.32722e+07	2.26458e+08	2.14421e+06	1.1202e+07	1.21379e+06	3.89803e+06	1.3603e+07		307736	2.52324e+06		1.56374e+07	102905	1386365225	3.07073e+07		184330	3.10186e+06	3.32422e+07	5.89387e+08	3.65459e+07	488115	1.74866e+08	2.41934e+06	3.66864e+07	299676969	4.8471e+06	6.59871e+07	1.48711e+07	2.19292e+08	6.27902e+06		1.70264e+07	5.32807e+06	2.07291e+07	9351004162	2.79227e+08	8.82684e+07	1.26655e+06	2029010031	4.01196e+06	69623.7	1.68297e+07	1.59824e+06		6.6426e+07	1.07738e+06
20201009_QEF1_HILIC_liver_kidney_BP422	ZIC_kidney			3.07733e+08	2.59473e+06	5.95789e+06	1.17058e+06	9.15702e+06	1.02757e+07		73843.7	3.20308e+06		2.7703e+06	226264	1590206811	1.36018e+06		268360	1.46359e+06	128099447	1445211169	1.81176e+07	191608	110866725	1.379e+06	3.52036e+07	147705371	6.60331e+07	4.90012e+08	1.33928e+07	1.87981e+08	6.75166e+06		1.52247e+08	3.13358e+06	4.83796e+06	7785986047	1.99207e+08	3.94498e+07	632778	3807654881	5.66934e+07	40504	1.27415e+08	7.29136e+06	2.11386e+07	3.86961e+07	919541
20201009_QEF1_HILIC_liver_kidney_BP423	ZIC_kidney			3.18922e+08	1.6279e+06	5.86974e+06	1.30108e+06	7.83729e+06	1.07599e+07		54325	2.78372e+06		3.2213e+06	121888	1690155585	1.32682e+06		184335	2.21867e+06	1.3174e+08	1432494562	1.80655e+07	220572	1.21709e+08	1.21021e+06	9.68938e+07	1.61106e+08	7.68132e+07	5.73422e+08	1.24543e+07	127723750	6.51622e+06		1.93595e+08	3.11383e+06	5.11991e+06	5747916867	1.97123e+08	2.99744e+07	511437	3883907136	6.42108e+07	31227.1	1.08794e+08	2.38405e+06	1.50097e+07	2.88995e+07	1.18927e+06
20201009_QEF1_HILIC_liver_kidney_BP424	ZIC_kidney			283374038	2.67504e+06	6.773e+06	1.31783e+06	6.70658e+06	1.07591e+07		95003.7	2.89592e+06		2.81281e+06	281087	1774212101	1.38705e+06		151715	1.17391e+06	1.29858e+08	1030095498	1.72744e+07	201705	9.07434e+07	1.53647e+06	3.00454e+07	1.61359e+08	6.45221e+07	4.52e+08	7.48584e+06	1.51785e+08	6.54583e+06		1.85308e+08	2.72171e+06	4.55235e+06	8860050917	2.43054e+08	3.51837e+07	609326	4375260444	7.05628e+07	56136.6	1.77748e+08	1.70595e+07	2.74811e+07	3.18348e+07	1.00833e+06
20201009_QEF1_Acc_liver_kidney_BP407	Acc_liver	3.49697e+08		7.01715e+07	4.68585e+07			6.82947e+06	9.43052e+07	4.06958e+06				1.57332e+07		7.87926e+08	2.75986e+07	1.1202e+08				6.37831e+08	9.28303e+07			2.07315e+07		1140537761		2.43602e+07	9.45621e+07		8.66021e+07		4.77941e+08			3597283502							101607642			2.0626e+08	1.13693e+07
20201009_QEF1_Acc_liver_kidney_BP408	Acc_liver	6.65771e+08		8.14088e+07	4.14258e+07			8.66927e+06	7.02586e+07	3.93702e+06				1.32973e+07		9.57262e+08	2.3223e+07	1.01775e+08				977107873	8.50414e+07			1.82067e+07		1116392580		4.30862e+06	7.36904e+07		7.02586e+07		4.25561e+08			7436968668							1.07705e+08			158409673	5.48299e+06
20201009_QEF1_Acc_liver_kidney_BP409	Acc_liver	1.04261e+08		8.36189e+07	5.60684e+07				6.92067e+07	2.94371e+06				1.5496e+07		6.36152e+08	2.50951e+07	8.74363e+07				6.12481e+08	1.05289e+08			3.65685e+07		1143123223		1.71489e+07	5.36847e+07		6.2314e+07		430459531			5581662474							1.01821e+08			1.57262e+08	9.73843e+06
20201009_QEF1_Acc_liver_kidney_BP410	Acc_kidney	1.669e+08		1.55922e+08	6.77511e+07			7.5639e+06	2.37941e+08	3.25726e+06				2.35663e+06		8.04574e+08	3.85371e+06	2.8827e+07				1524558416	6.22438e+07			2.3586e+07		1111821619		3.06745e+08	6.67025e+07		1.91539e+08		1978654145			4309332466							1.46666e+07			1.10442e+08	1.17438e+07
20201009_QEF1_Acc_liver_kidney_BP411	Acc_kidney	3.89444e+08		174632023	4.20326e+07			9.28189e+06	2.15865e+08	2.88331e+06				2.42892e+06		7.80322e+08	4.36008e+06	2.57893e+07				1650981576	5.58392e+07			1.83207e+07		1022283451		2.59688e+08	5.81575e+07		1.734e+08		2372394778			3132777841							1.792e+07			6.53332e+07	1.06128e+07
20201009_QEF1_Acc_liver_kidney_BP412	Acc_kidney	8.80831e+07		1.95058e+08	6.58062e+07			9.0465e+06	2.14574e+08	3.19839e+06				2.69436e+06		9.62772e+08	3.24748e+06	3.20593e+07				1313282890	6.81801e+07			1.93516e+07		1267530519		3.10078e+08	3.3381e+07		1.99377e+08		2817276532			5839375242							9.37233e+06			8.89554e+07	1.15333e+07
20201009_QEF2_LUNA_liver_kidney_BP413	LUNA_liver	3.51475e+07	3.46464e+07		1.45507e+07	3.3144e+06					3.58906e+06					9.6888e+08					1.12786e+08	5.28055e+08	6.32386e+07	357112	3.01025e+07	3.5576e+07	3.51475e+07	3.92197e+08		2.19094e+06	6.92638e+06	1.0647e+08	1.96232e+06	4.38107e+06		1.60491e+07	3.98193e+06	2474698425	2.32019e+08	7.42018e+07		1108720304			2.84773e+08	7.98148e+07	8.30852e+07	1.78086e+06	3.29605e+06
20201009_QEF2_LUNA_liver_kidney_BP414	LUNA_liver	8.18201e+07	3.02497e+07		1.02742e+07	4.19923e+06					4.22485e+06					1056384150					1.55924e+08	7.16728e+08	4.67758e+07	1.05992e+06	2.58553e+07	3.77445e+07	8.18201e+07	356141256		517209	3.41063e+06	9.69721e+07	1.70805e+06	3.56323e+06		1.0474e+07	4.37055e+06	3688288056	236376008	6.89514e+07		1106974944			2.55451e+08	5.77084e+07	4.34406e+07	1.6424e+06	3.13897e+06
20201009_QEF2_LUNA_liver_kidney_BP415	LUNA_liver	1.4329e+07	3.82849e+07		1.45575e+07	5.80429e+06					2.85274e+06					8.47659e+08					1.08996e+08	5.25765e+08	8.46323e+07	1.02435e+06	2.24516e+07	2.98515e+07	1.4329e+07	3.84817e+08		2.49233e+06	6.04495e+06	5.57867e+07	1.34685e+06	2.99177e+06		1.40133e+07	4.52109e+06	3804959347	2.17477e+08	7.18164e+07		1062047322			3.14397e+08	9.24376e+07	6.84168e+07	1.49835e+06	2.54764e+06
20201009_QEF2_LUNA_liver_kidney_BP416	LUNA_kidney	1.56478e+07	2.98333e+06		7.94519e+06	3.0449e+06					525680					1004156295					2.88299e+08	1340695431	3.66733e+07	192888	4.59334e+06	2.41128e+07	1.56478e+07	3.57291e+08		4.15915e+07	8.30289e+06	4.29396e+07	1.3785e+06	2.12019e+06		7.43047e+06		3191148905	1.65123e+08	3.44922e+07		2294112151			9.23262e+08	1.45377e+08	138950860	848464	1.85906e+06
20201009_QEF2_LUNA_liver_kidney_BP417	LUNA_kidney	3.87564e+07	4.12946e+06		7.01044e+06	2.53147e+06					745617					1050267890					2.60613e+08	1250669892	3.61568e+07	415727	4.69585e+06	1.75892e+07	3.87564e+07	4.13942e+08		34638510	6.12289e+06	1.29358e+07	1.1442e+06			7.11274e+06		2304589087	1.48777e+08	2.62623e+07		2206525761			9.62462e+08	1.51366e+08	1.26216e+08	296800	2.57876e+06
20201009_QEF2_LUNA_liver_kidney_BP418	LUNA_kidney	1.16921e+07	3.12846e+06		4.50398e+06	2.43079e+06					548049					1096722441					2.07514e+08	9.63987e+08	3.17357e+07		5.01403e+06	2.19714e+07	1.16921e+07	3.36211e+08		4.84591e+07	4.80099e+06	3.69645e+07	1.47613e+06	2.19445e+06		6.65686e+06		3197011513	1.90688e+08	3.1708e+07		2556583680			8.1423e+08	1.05806e+08	2.30649e+08	718672	2.18589e+06
[truncated: 120 more columns]

## Sheet: sample key
File name	Sample	Extraction buffer	Chromatography
20201009_QEF1_HILIC_liver_kidney_BP419	liver chunk, split in three	Buffer C + Ellmans	ZIC-HILIC
20201009_QEF1_HILIC_liver_kidney_BP420	liver chunk, split in three	Buffer C + Ellmans	ZIC-HILIC
20201009_QEF1_HILIC_liver_kidney_BP421	liver chunk, split in three	Buffer C + Ellmans	ZIC-HILIC
20201009_QEF1_HILIC_liver_kidney_BP422	kidney chunk, split in three	Buffer C + Ellmans	ZIC-HILIC
20201009_QEF1_HILIC_liver_kidney_BP423	kidney chunk, split in three	Buffer C + Ellmans	ZIC-HILIC
20201009_QEF1_HILIC_liver_kidney_BP424	kidney chunk, split in three	Buffer C + Ellmans	ZIC-HILIC
20201009_QEF1_HILIC_liver_kidney_BP431_pool1x	pool 419-424	Buffer C + Ellmans	ZIC-HILIC
20201009_QEF1_HILIC_liver_kidney_BP432_pool03	pool 419-424 1/3 dilution	Buffer C + Ellmans	ZIC-HILIC
20201009_QEF1_HILIC_liver_kidney_BP433_pool01x	pool 419-424 1/10 dilution	Buffer C + Ellmans	ZIC-HILIC
20201009_QEF1_Acc_liver_kidney_BP407	liver chunk, split in three	Buffer C + Ellmans	Accucore NH2
20201009_QEF1_Acc_liver_kidney_BP408	liver chunk, split in three	Buffer C + Ellmans	Accucore NH2
20201009_QEF1_Acc_liver_kidney_BP409	liver chunk, split in three	Buffer C + Ellmans	Accucore NH2
20201009_QEF1_Acc_liver_kidney_BP410	kidney chunk, split in three	Buffer C + Ellmans	Accucore NH2
20201009_QEF1_Acc_liver_kidney_BP411	kidney chunk, split in three	Buffer C + Ellmans	Accucore NH2
20201009_QEF1_Acc_liver_kidney_BP412	kidney chunk, split in three	Buffer C + Ellmans	Accucore NH2
20201009_QEF1_Acc_liver_kidney_BP425_pool1x	pool 407-412	Buffer C + Ellmans	Accucore NH2
20201009_QEF1_Acc_liver_kidney_BP426_pool03x	pool 407-412 1/3 dilution	Buffer C + Ellmans	Accucore NH2
20201009_QEF1_Acc_liver_kidney_BP427_pool01x	pool 407-412 1/10 dilution	Buffer C + Ellmans	Accucore NH2
20201009_QEF2_LUNA_liver_kidney_BP413	liver chunk, split in three	Buffer C + Ellmans	LUNA amide
20201009_QEF2_LUNA_liver_kidney_BP414	liver chunk, split in three	Buffer C + Ellmans	LUNA amide
20201009_QEF2_LUNA_liver_kidney_BP415	liver chunk, split in three	Buffer C + Ellmans	LUNA amide
20201009_QEF2_LUNA_liver_kidney_BP416	kidney chunk, split in three	Buffer C + Ellmans	LUNA amide
20201009_QEF2_LUNA_liver_kidney_BP417	kidney chunk, split in three	Buffer C + Ellmans	LUNA amide
20201009_QEF2_LUNA_liver_kidney_BP418	kidney chunk, split in three	Buffer C + Ellmans	LUNA amide
20201009_QEF2_LUNA_liver_kidney_BP419_pool1x	pool 413-418	Buffer C + Ellmans	LUNA amide
20201009_QEF2_LUNA_liver_kidney_BP420_pool03x	pool 413-418 1/3 dilution	Buffer C + Ellmans	LUNA amide
20201009_QEF2_LUNA_liver_kidney_BP421_pool01x	pool 413-418 1/10 dilution	Buffer C + Ellmans	LUNA amide
