# Supplementary material for: Redox Metabolism Measurement in Mammalian Cells and Tissues by LC-MS
Source: Metabolites. 2021 May 13;11(5):313. doi: 10.3390/metabo11050313 (PMC8153172; doi:10.3390/metabo11050313)
Supplement: Supplementary file 1 [file metabolites-11-00313-s001.zip]

Archive with 8 entries (8 files):
- Table S1. Standards and retention times.xlsx
- Table S2. Column comparison.xlsx
- Table S3. Tissues buffer comparison.xlsx
- Table S4. K562 buffer comparison.xlsx
- Figure S4. Application of the redox metabolite detection method for profiling redox state following pharmacologic perturbations of redox balanc.pdf
- Figure S2. Optimization of redox metabolite detection in mammalian cells.pdf
- Figure S3. Application of the redox metabolite detection method for mammalian tissues.pdf
- FIgure S1. Optimization of redox metabolites detection by LC-MS.pdf
