# Supplementary material for: Redox Metabolism Measurement in Mammalian Cells and Tissues by LC-MS
Source: Metabolites. 2021 May 13;11(5):313. doi: 10.3390/metabo11050313 (PMC8153172; doi:10.3390/metabo11050313)
Supplement: Supplementary file 1 [file metabolites-11-00313-s001.zip › Table S4. K562 buffer comparison.xlsx]

## Sheet: K562 cells 4 buffers comparison
Filename	1-methylnicotinamide	2,3-BPG	2-aminobutyric_acid	2-hydroxybutyric_acid	2-hydroxyglutarate	2-oxoadipate	2-oxobutyric_acid	3-hydroxybutyric_acid	3-hydroxyisobutyric_acid	3-methyl-2-oxopentanoic_acid	3-phosphoglycerate	3-ureidopropionate	5-Hydroxyindole-3-Acetate	6-phosphogluconate	acetoacetate	Acetyl CoA	acetylalanine	acetylaspartate	acetylcarnitine	acetylglutamate	acetylglycine	acetylserine	adenine	adenosine	ADP-ribose	ADP	AICAR	alanine-13C3-15N	alanine	allantoin	alpha-keto-isovalerate	Alpha-Ketoglutarate	Alpha-Lipoic Acid	amidoadipate	AMP	anserine	arginine-13C6-15N4	arginine	argininosuccinate	ascorbate	asparagine	aspartate-13C6-15N4	aspartate	asymmetric dimethylarginine (ADMA)	ATP	beta-alanine	betaine	biotin	Butyrylcarnitine
20210109_QEF1_HILIC_K562_4buffers_repeat_blank1	N/F	N/F	N/F	N/F	2471033	N/F	N/F	374358	N/F	N/F	N/F	N/F	N/F	N/F	N/F	N/F	N/F	N/F	N/F	N/F	N/F	N/F	N/F	N/F	N/F	N/F	N/F	N/F	N/F	N/F	N/F	N/F	N/F	N/F	N/F	N/F	N/F	603607	N/F	N/F	N/F	N/F	N/F	N/F	N/F	N/F	N/F	N/F	N/F
20210109_QEF1_HILIC_K562_4buffers_repeat_blank2	N/F	N/F	N/F	N/F	2522371	N/F	N/F	352088	N/F	N/F	N/F	N/F	N/F	N/F	N/F	N/F	N/F	N/F	N/F	N/F	N/F	N/F	N/F	N/F	N/F	N/F	N/F	N/F	N/F	N/F	N/F	N/F	N/F	N/F	N/F	N/F	N/F	N/F	N/F	N/F	N/F	N/F	N/F	N/F	N/F	N/F	N/F	N/F	N/F
20210109_QEF1_HILIC_K562_4buffers_repeat_blank3	N/F	N/F	N/F	N/F	N/F	N/F	N/F	430438	N/F	N/F	N/F	N/F	N/F	N/F	N/F	N/F	N/F	N/F	N/F	N/F	N/F	N/F	N/F	290653	N/F	N/F	N/F	N/F	N/F	N/F	N/F	N/F	N/F	N/F	N/F	N/F	N/F	N/F	N/F	N/F	N/F	N/F	N/F	N/F	N/F	N/F	N/F	N/F	N/F
20210109_QEF1_HILIC_K562_4buffers_repeat_blank4	N/F	N/F	N/F	N/F	N/F	N/F	N/F	429113	N/F	N/F	N/F	N/F	N/F	N/F	N/F	N/F	N/F	N/F	N/F	N/F	N/F	N/F	N/F	481758	N/F	N/F	N/F	N/F	N/F	N/F	N/F	N/F	N/F	N/F	N/F	N/F	N/F	N/F	N/F	N/F	N/F	N/F	N/F	N/F	N/F	N/F	N/F	N/F	N/F
20210109_QEF1_HILIC_K562_4buffers_repeat_blank5	N/F	N/F	N/F	N/F	925056	40043	N/F	352067	N/F	N/F	N/F	N/F	N/F	N/F	N/F	N/F	N/F	N/F	191031	N/F	N/F	N/F	N/F	444258	N/F	N/F	N/F	N/F	N/F	N/F	N/F	N/F	N/F	N/F	N/F	N/F	N/F	1724185	N/F	N/F	N/F	N/F	N/F	N/F	N/F	N/F	N/F	N/F	N/F
20210109_QEF1_HILIC_K562_4buffers_repeat_BP676	N/F	257808	N/F	1364008	59319544	N/F	N/F	1329377	500041	1950761	13282806	40439	N/F	N/F	N/F	3453198	N/F	8388853	1007318808	1823692	N/F	6647551	32383002	1589106	N/F	62639678	N/F	11271492	287443584	N/F	N/F	N/F	92340360	3682248	56150126	N/F	656049492	1082635222	9704299	777895	138693515	31257385	37912419	19574436	90212665	103369621	845309298	32166808	128897948
20210109_QEF1_HILIC_K562_4buffers_repeat_BP677	N/F	217516	N/F	1125803	64771992	N/F	N/F	1578257	509997	2090430	13630324	N/F	188029	N/F	N/F	3005855	N/F	7912775	1032026597	1911669	N/F	6934102	57840722	2852362	N/F	61131231	39491	10009418	281289357	N/F	N/F	N/F	88802702	4514455	56775371	249130	535346634	955462580	9289471	2009229	131263785	28415300	36139779	18928102	72193270	94944800	858199096	31073812	133355895
20210109_QEF1_HILIC_K562_4buffers_repeat_BP678	N/F	336446	N/F	1946025	55428455	N/F	N/F	1787242	1100438	5059914	26432795	N/F	234272	N/F	N/F	6235936	N/F	16118914	1945957621	2874002	N/F	14727211	43252305	1915099	N/F	114501650	94107	8479300	493231938	N/F	N/F	N/F	96972033	7684452	104915330	733800	574690656	1817780749	17993194	1351305	195337448	23250864	57120993	40625972	95349086	184619227	1642374452	63086920	255905945
20210109_QEF1_HILIC_K562_4buffers_repeat_BP679	N/F	520500	N/F	1813346	53129252	N/F	N/F	2305699	899805	11347176	28672076	N/F	275005	N/F	N/F	6311543	N/F	14051462	1863463008	2679580	N/F	15678677	37236893	983843	N/F	135818977	99760	7879352	438777908	N/F	N/F	N/F	91204659	6502174	106471792	599753	485281592	1601263706	17568565	1580104	204318525	22036897	55562835	38515499	147687567	170669375	1578648640	66794369	260856673
20210109_QEF1_HILIC_K562_4buffers_repeat_BP680	N/F	852950	N/F	3414364	46465451	N/F	N/F	4584124	2255527	32258837	58314246	N/F	618208	N/F	N/F	15492256	N/F	21363471	4181404724	4228450	N/F	33193595	47312910	1362657	N/F	279422577	306254	5334856	701437305	744895	918569	N/F	93273777	9865579	291853469	1537944	343975360	2666038362	35207508	3231139	331397731	14514163	83602000	87091341	245296719	330070547	3621389695	144061401	589969784
20210109_QEF1_HILIC_K562_4buffers_repeat_BP681	N/F	1042315	N/F	3978455	49531998	N/F	N/F	4321668	2247353	26257258	57352584	N/F	888078	N/F	N/F	15815278	N/F	21986907	4395843743	4566371	N/F	34486825	46077619	1178521	N/F	296430895	348107	3783215	736462841	1469973	637271	N/F	86840790	10124960	315660321	1307101	322871070	2621876296	36312991	3331292	361446897	14672055	85861545	94044760	242404605	340572187	3763963201	151381392	606883019
20210109_QEF1_HILIC_K562_4buffers_repeat_BP682	N/F	N/F	N/F	1328840	11330265	N/F	N/F	1352211	733810	28666088	29668831	N/F	N/F	N/F	N/F	N/F	N/F	8842060	1056035314	1234515	N/F	15729309	3651706	20085159	N/F	24856352	76107	4115211	332358673	10508140	1556472	N/F	N/F	3550579	60416768	187945	213966762	1250995570	6799561	3248967	87692765	25916364	81787990	27133112	7701357	90988771	907700990	32016319	133127117
20210109_QEF1_HILIC_K562_4buffers_repeat_BP683	N/F	N/F	N/F	1050714	9861140	N/F	N/F	1188851	647093	30423439	12534619	N/F	N/F	N/F	N/F	N/F	N/F	8748350	999697621	1145076	N/F	13554247	4499289	27403688	N/F	13561500	75840	2836606	324084209	8794080	1996586	N/F	N/F	3970684	54866280	134572	198452992	1021292047	5492409	3071089	78551931	23668943	74117004	24259151	3100887	85262226	848154213	28561965	127286690
20210109_QEF1_HILIC_K562_4buffers_repeat_BP684	N/F	N/F	N/F	1851310	11084096	N/F	N/F	1952081	1080541	59877916	19302788	N/F	N/F	N/F	N/F	N/F	N/F	14105164	1934482252	1826587	N/F	26296128	5935618	62099719	N/F	28911836	175288	1123810	479443579	14279486	4791390	N/F	N/F	7158702	105112261	245112	176431256	1765173803	12731652	5949868	141340862	16944400	107753865	44055125	7120630	163661764	1631963364	54393834	262856497
20210109_QEF1_HILIC_K562_4buffers_repeat_BP685	N/F	N/F	N/F	1994846	12857103	N/F	N/F	1952214	1271829	59825193	48122731	N/F	N/F	N/F	N/F	509481	N/F	15814878	2038018482	1979672	N/F	26313099	7500235	23582362	N/F	52662865	179121	3172345	510318033	13436050	3592348	N/F	N/F	7698535	104325012	369870	183870509	2092619094	12080391	5961048	155695336	16184849	108814017	52184171	19954677	184874830	1682151923	49820919	262244930
20210109_QEF1_HILIC_K562_4buffers_repeat_BP686	N/F	N/F	N/F	3628976	18448286	N/F	N/F	3936243	2403137	110880178	98932092	N/F	69861	N/F	N/F	1380063	N/F	20369395	4055395946	3545562	N/F	57231639	13814096	242376902	N/F	108830895	405539	N/F	713365245	31505227	7948628	N/F	N/F	11833612	300052668	1067577	117893741	2844450441	27626126	11736826	318635430	7331643	112544752	102528413	32561523	317185968	3470555761	103875433	588427398
20210109_QEF1_HILIC_K562_4buffers_repeat_BP687	N/F	N/F	N/F	3835380	20141565	N/F	N/F	4446650	2097762	116047115	69268220	N/F	113686	N/F	N/F	648992	N/F	24083229	4313656417	4136465	N/F	53742189	13573069	145342843	N/F	88087857	406501	N/F	791995332	27947483	8431216	N/F	N/F	13133741	292022230	818962	112999021	2794871756	30996011	12021084	322326120	7689336	118785550	113475770	17773546	330435049	3783129411	108529934	615291691
20210109_QEF1_HILIC_K562_4buffers_repeat_BP688	N/F	201332	N/F	1010259	1018676891	2360781	49646647	1540201	502313	23634551	13183292	N/F	N/F	N/F	N/F	2325497	N/F	8473343	950908066	1970022	N/F	8146280	28838779	50619	N/F	60225047	N/F	6047761	277052882	N/F	1769916	N/F	472174	12474461	48729842	N/F	326976981	1035999504	5962335	200557068	86738101	5177702	14405961	15926124	83012793	90290597	807194100	29399652	130949819
20210109_QEF1_HILIC_K562_4buffers_repeat_BP689	N/F	214161	N/F	1009876	1224366125	2658715	47332278	1217973	481415	23067777	11535992	N/F	N/F	N/F	N/F	2339163	N/F	10893010	1004402456	2271858	N/F	7532067	45354199	1417055	N/F	50471643	N/F	7551365	300698636	N/F	1681289	N/F	395141	15465580	50744685	255434	318930003	952203312	6647547	229431514	84113277	5891267	14976782	17015924	48833917	98747310	850221272	28636781	134560764
20210109_QEF1_HILIC_K562_4buffers_repeat_BP690	N/F	522415	15569188	2210844	1738171002	1995323	47236372	1849177	1150605	61352209	25063338	N/F	N/F	N/F	N/F	6039052	N/F	14718432	1915609266	3291103	N/F	11426463	60590052	238390	N/F	136912576	N/F	5633044	476633121	N/F	3618559	N/F	459590	12644459	97090987	801294	278084076	1743137444	11935917	209604096	156450921	5480776	29947883	31639860	155138406	167378082	1638214704	59956941	266768942
20210109_QEF1_HILIC_K562_4buffers_repeat_BP691	N/F	411639	N/F	1930324	1897088817	1541862	45252052	1753779	888222	56212912	18742848	N/F	317536	N/F	N/F	5484264	N/F	14273513	1715873184	2178336	N/F	10924410	17145264	441051	N/F	101637879	N/F	5341554	455437487	N/F	4398481	N/F	440851	11712902	75967453	562939	253407619	1536093667	12485136	265375908	130249158	5281734	30295011	31446158	89154689	156812772	1505476488	49559460	231133304
20210109_QEF1_HILIC_K562_4buffers_repeat_BP692	N/F	1251105	N/F	4353546	1075033728	2755204	37774944	3967697	2098489	101939216	59347613	N/F	N/F	N/F	N/F	16360240	N/F	20675174	4355479406	4599753	N/F	25836757	63366028	546159	N/F	325932588	354576	3045465	723747380	1386574	6752567	N/F	763720	13148286	280470686	1430752	186250202	2816871071	25308271	114752665	327022381	4908299	61214443	77469951	348223115	330988770	3780589486	129828793	663156745
20210109_QEF1_HILIC_K562_4buffers_repeat_BP693	N/F	825479	35903871	4284032	1366665786	2892778	40438906	4264462	2209233	111701438	51500334	N/F	N/F	N/F	N/F	15542441	N/F	24781575	4549160653	5199425	N/F	26142220	75579762	1151108	N/F	272938438	262382	2884171	765077819	1040111	7115064	N/F	924523	15285399	293828589	1784512	198263241	2972804796	25674887	132795737	331806912	4909058	64192320	84052276	200217208	346189340	3983243599	128339474	664595010
20210109_QEF1_HILIC_K562_4buffers_repeat_BP694	N/F	254601	N/F	N/F	1664431417	1488010	43228541	N/F	273305	37002038	10538788	N/F	N/F	N/F	N/F	2811178	N/F	12287733	957604885	3585909	N/F	8622871	43661333	2889041	N/F	55523615	N/F	6464610	297920671	N/F	3170451	N/F	N/F	14048288	50387392	326901	321029364	1124022390	6247798	83484577	90985427	5551872	18505584	15796499	71881781	95522351	867662963	18021013	123791364
20210109_QEF1_HILIC_K562_4buffers_repeat_BP695	N/F	239557	N/F	N/F	1587572835	1884732	39430907	N/F	489635	31274615	14291828	N/F	N/F	N/F	N/F	2960022	N/F	11759957	967757110	2304266	N/F	9386782	39598643	2566063	N/F	59085254	N/F	6399787	311316456	N/F	2502162	N/F	N/F	12847780	56646723	378568	331165213	1059277297	7070111	123349585	90846621	5535833	15873057	16032269	70605082	94516233	858956621	18299257	133327505
20210109_QEF1_HILIC_K562_4buffers_repeat_BP696	N/F	507586	40698139	N/F	1823283901	1381524	38113049	1460295	746835	64073288	24013975	N/F	N/F	N/F	N/F	6009072	N/F	17191595	1678624532	2366639	N/F	10510311	63491206	4616941	N/F	112384959	N/F	5641693	445654800	N/F	4540839	N/F	N/F	11579064	106851174	650949	256142777	1526482670	13943509	157427179	151957540	5022073	28992029	29777245	126281134	158564248	1460742902	34289920	236852106
20210109_QEF1_HILIC_K562_4buffers_repeat_BP697	N/F	380269	21903178	N/F	1771432067	1917719	38322648	1080952	593298	54867601	23201443	N/F	N/F	N/F	N/F	5527783	N/F	14309368	1565980964	2791344	N/F	12073500	53237052	4757736	N/F	108966859	N/F	5094379	425744120	N/F	4375233	N/F	N/F	12026306	98810512	599021	276532887	1565100341	12878899	151311431	149688550	5573376	27866207	28127031	142653336	158512798	1399397094	33575842	223687856
20210109_QEF1_HILIC_K562_4buffers_repeat_BP698	N/F	1126959	55369870	N/F	1713874169	1055796	39222765	3399782	2038298	123788594	47163864	N/F	363912	N/F	N/F	13640967	N/F	22997193	3670393447	4317166	N/F	24771349	87497991	12582583	N/F	225238200	251420	2268991	716368872	946087	9477251	N/F	N/F	12102982	267420531	1375128	175221031	2538456688	28877467	246520661	292105792	4237052	52332163	69056419	194652123	305028991	3177344342	78607013	528579198
20210109_QEF1_HILIC_K562_4buffers_repeat_BP699	N/F	1548970	68821247	N/F	1828596801	1237552	37290478	3621318	2209290	136211817	53983079	N/F	740553	N/F	N/F	15510106	N/F	25823643	4162553813	4204869	N/F	25547747	137289544	15173270	N/F	255467326	298393	2351267	739477012	1035750	9802542	N/F	N/F	17268359	304187988	1959675	192282280	3002317445	30774167	285656055	324093766	4893545	62368899	83115099	205072417	358734337	3789956717	85115445	599536026
20210109_QEF1_HILIC_K562_4buffers_repeat_BP700_pool1x_a	N/F	346598	N/F	N/F	1007557777	1264530	19280551	2494875	1138749	56676103	26388159	N/F	N/F	N/F	N/F	5488781	N/F	19219779	2465535207	3399593	N/F	17751724	76020441	7477527	N/F	155699181	78173	5871209	605359698	N/F	4541410	N/F	18963881	12138532	123925477	1345796	356488094	2470236929	19343011	73279172	212379739	7082344	38853012	53249876	75250160	242578486	2096876392	88215498	332980251
20210109_QEF1_HILIC_K562_4buffers_repeat_BP700_pool1x_b	N/F	389556	19634316	N/F	982268781	1119183	19699892	2633040	1090124	57050756	25580053	N/F	N/F	N/F	N/F	5415910	N/F	19216986	2468409128	3490772	N/F	18458940	65457237	5567247	N/F	155539923	129495	4858867	572818005	N/F	4411876	N/F	19083842	15427911	120447419	1020453	272538607	1886929954	19234651	73295037	207120201	7377167	37419208	48043708	74877688	214202253	2090600388	72969493	352787898
20210109_QEF1_HILIC_K562_4buffers_repeat_BP700_pool1x_c	N/F	529671	N/F	N/F	974996679	1006824	20788569	2034817	1089953	54704129	29309722	N/F	N/F	N/F	N/F	6020241	N/F	16875213	2386874511	2808176	N/F	17370529	63639823	4918216	N/F	169644865	158115	4246880	518391430	N/F	3955893	N/F	19178728	9809709	120321313	1013474	259787207	1808243647	18759228	65448666	200239161	6941205	37988263	45426854	102671824	199004529	2053761993	74827406	333180292
20210109_QEF1_HILIC_K562_4buffers_repeat_BP700_pool1x_d	N/F	529070	N/F	N/F	966150168	1066264	20626394	3376082	1308533	51432822	29020758	N/F	N/F	N/F	N/F	6227804	N/F	15864016	2286191849	3111616	N/F	16520444	63867529	4562668	N/F	176041329	91791	3408350	519890687	N/F	4456318	N/F	18696317	9566035	117539582	1061062	266014976	1866286986	17417736	62074670	199273750	7249085	37489241	42897001	122086053	197559295	2023430987	74033413	324838303
20210109_QEF1_HILIC_K562_4buffers_repeat_BP700_pool1x_e	N/F	502477	N/F	N/F	944082432	618225	20442531	3144109	834330	54117046	27886619	N/F	N/F	N/F	N/F	5380215	N/F	14759403	2294781536	3000938	N/F	16264794	65175676	4934730	N/F	172196812	113883	4225018	502676330	N/F	4520116	N/F	18800096	10015770	117194488	1101688	269545848	1870911653	17322652	59624384	205997256	6743316	36499878	41085878	111754399	189558136	1990528230	72322151	325603673
20210109_QEF1_HILIC_K562_4buffers_repeat_BP701_pool03x	N/F	127905	N/F	N/F	512577535	719876	8273002	1270147	492253	18770500	9116230	N/F	N/F	N/F	N/F	1901127	N/F	7277029	835227886	1321837	N/F	8757969	45742682	4029952	N/F	51338847	43978	1602313	246841428	333115	1417673	N/F	5778171	4978377	46077189	308937	130407760	942210893	8976875	52748959	79200908	3889997	20673905	17249831	30581573	78354999	700922154	35151036	112005876
20210109_QEF1_HILIC_K562_4buffers_repeat_BP702_pool01x_a	N/F	N/F	N/F	N/F	279161403	247146	1790864	731016	99534	4857517	1359195	N/F	N/F	N/F	N/F	531291	N/F	3176302	227773236	392204	N/F	2745898	17391739	4282305	N/F	9235304	N/F	449788	87907495	N/F	366901	N/F	1355052	2824451	14505657	N/F	60714114	448623764	2503980	32443057	19760304	1120952	6927396	5725758	5823689	27690582	189707960	9369812	29227598
20210109_QEF1_HILIC_K562_4buffers_repeat_BP702_pool01x_b	N/F	N/F	N/F	N/F	263697413	N/F	2315350	627764	188401	5096502	1487475	N/F	N/F	N/F	N/F	411133	N/F	2479699	225762040	371888	N/F	2590734	19168421	4105415	N/F	10234076	N/F	N/F	73703604	N/F	400935	N/F	1316686	1668102	15037765	N/F	48124424	367157062	2522566	30080496	19495950	1690000	8904014	4992525	7147331	20487055	195956178	10344079	28520801
[truncated: 168 more columns]

## Sheet: normalized and combined data
Filename	Group	2,3-BPG	2-aminobutyric_acid	2-hydroxybutyric_acid	2-hydroxyglutarate	2-oxoadipate	2-oxobutyric_acid	3-hydroxybutyric_acid	3-hydroxyisobutyric_acid	3-methyl-2-oxopentanoic_acid	3-phosphoglycerate	5-Hydroxyindole-3-Acetate	Acetyl CoA	acetylaspartate	acetylcarnitine	acetylglutamate	acetylserine	adenine	adenosine	ADP	AICAR	alanine-13C3-15N	alanine	allantoin	alpha-keto-isovalerate	Alpha-Lipoic Acid	amidoadipate	AMP	anserine	arginine-13C6-15N4	arginine	argininosuccinate	ascorbate	asparagine	aspartate-13C6-15N4	aspartate	asymmetric dimethylarginine (ADMA)	ATP	beta-alanine	betaine	biotin	Butyrylcarnitine	C5 Carnitines	cAMP	carnitine	carnosine	CDP	choline	cis-aconitate
20210109_QEF1_HILIC_K562_4buffers_repeat_BP676	Buffer A	273938		1.44935e+06	6.3031e+07			1.41255e+06	531327	2.07282e+06	1.41139e+07		3.66926e+06	8.91372e+06	1.07034e+09	1.9378e+06	7.06347e+06	3.44091e+07	1.68853e+06	6.65589e+07		1.19767e+07	3.05428e+08			9.81179e+07	3.91264e+06	5.96633e+07		6.97097e+08	1.15037e+09	1.03115e+07	826566	1.47371e+08	3.32131e+07	4.02845e+07	2.07992e+07	9.58571e+07	1.09837e+08	8.98198e+08	3.41794e+07	1.36963e+08	3.32603e+08	484543	1.98926e+09	3.69855e+06	3.20749e+06	3.6082e+07	1.43568e+07
20210109_QEF1_HILIC_K562_4buffers_repeat_BP677	Buffer A**	241909		1.25206e+06	7.20358e+07			1.75525e+06	567190	2.32486e+06	1.51589e+07	209115	3.34295e+06	8.80015e+06	1.14776e+09	2.12605e+06	7.71172e+06	6.43273e+07	3.17224e+06	6.79868e+07	43919.7	1.11319e+07	3.12834e+08			9.87615e+07	5.02073e+06	6.31424e+07	277069	5.95383e+08	1.06261e+09	1.03312e+07	2.23455e+06	1.45984e+08	3.16019e+07	4.01927e+07	2.10508e+07	8.02894e+07	1.05592e+08	9.54442e+08	3.45586e+07	1.48311e+08	3.62696e+08	552033	2.07162e+09	3.63143e+06	3.28107e+06	3.46092e+07	1.23949e+07
20210109_QEF1_HILIC_K562_4buffers_repeat_BP678	Buffer A	451493		2.61146e+06	7.43821e+07			2.39838e+06	1.47673e+06	6.79014e+06	3.54714e+07	314381	8.3683e+06	2.16307e+07	2.61137e+09	3.85676e+06	1.97631e+07	5.80423e+07	2.56996e+06	1.53655e+08	126287	1.13788e+07	6.61891e+08			1.30131e+08	1.03121e+07	1.40791e+08	984721	7.71204e+08	2.43937e+09	2.41459e+07	1.81338e+06	2.62133e+08	3.12014e+07	7.66533e+07	5.45179e+07	1.27953e+08	2.47749e+08	2.20398e+09	8.46593e+07	3.43412e+08	8.2031e+08	1.91726e+06	4.91281e+09	8.66323e+06	6.67036e+06	7.34293e+07	2.69228e+07
20210109_QEF1_HILIC_K562_4buffers_repeat_BP679	Buffer A	695197		2.42196e+06	7.09612e+07			3.07957e+06	1.20181e+06	1.51557e+07	3.82954e+07	367306	8.4299e+06	1.87676e+07	2.4889e+09	3.57893e+06	2.09409e+07	4.97348e+07	1.31405e+06	1.81404e+08	133243	1.05239e+07	5.86046e+08			1.21816e+08	8.68451e+06	1.42207e+08	801050	6.48158e+08	2.1387e+09	2.34651e+07	2.11044e+06	2.72894e+08	2.94332e+07	7.42115e+07	5.14425e+07	1.97256e+08	2.27952e+08	2.10849e+09	8.92127e+07	3.48409e+08	8.17936e+08	1.56755e+06	4.64025e+09	8.15022e+06	7.94877e+06	6.98429e+07	3.31229e+07
20210109_QEF1_HILIC_K562_4buffers_repeat_BP680	Buffer A	1.44315e+06		5.77693e+06	7.86171e+07			7.7561e+06	3.81623e+06	5.45803e+07	9.86647e+07	1.04598e+06	2.62121e+07	3.61459e+07	7.07472e+09	7.15432e+06	5.61618e+07	8.0051e+07	2.30554e+06	4.72768e+08	518166	9.0263e+06	1.1868e+09	1.26032e+06	1.55417e+06	1.57814e+08	1.6692e+07	4.93801e+08	2.60212e+06	5.81988e+08	4.5108e+09	5.95693e+07	5.46692e+06	5.60708e+08	2.45572e+07	1.4145e+08	1.47354e+08	4.15029e+08	5.58462e+08	6.1272e+09	2.43744e+08	9.98198e+08	2.32147e+09	6.31404e+06	1.25183e+10	1.93068e+07	2.17825e+07	1.55694e+08	9.37827e+07
20210109_QEF1_HILIC_K562_4buffers_repeat_BP681	Buffer A	1.70078e+06		6.49176e+06	8.08228e+07			7.05179e+06	3.66707e+06	4.28447e+07	9.35839e+07	1.4491e+06	2.58062e+07	3.58767e+07	7.17282e+09	7.45108e+06	5.62731e+07	7.51862e+07	1.92303e+06	4.83695e+08	568016	6.17318e+06	1.20171e+09	2.3986e+06	1.03985e+06	1.41701e+08	1.65212e+07	5.15072e+08	2.13283e+06	5.26838e+08	4.27819e+09	5.92529e+07	5.43576e+06	5.89783e+08	2.39408e+07	1.40103e+08	1.53456e+08	3.95539e+08	5.55721e+08	6.14177e+09	2.47013e+08	9.90268e+08	2.25863e+09	5.84996e+06	1.24796e+10	1.99715e+07	2.23038e+07	1.71169e+08	9.56718e+07
20210109_QEF1_HILIC_K562_4buffers_repeat_BP682	Buffer B			1.54305e+06	1.31567e+07			1.57019e+06	852100	3.3287e+07	3.44514e+07			1.02674e+07	1.22627e+09	1.43352e+06	1.82649e+07	4.24036e+06	2.33229e+07	2.88632e+07	88375.4	4.77858e+06	3.85935e+08	1.2202e+07	1.80737e+06		4.12293e+06	7.01559e+07	218242	2.48458e+08	1.45266e+09	7.89565e+06	3.7727e+06	1.01829e+08	3.00941e+07	9.49722e+07	3.15069e+07	8.94281e+06	1.05656e+08	1.05402e+09	3.71773e+07	1.54587e+08	3.84108e+08	853834	2.19971e+09	7.69567e+06	1.60826e+06	3.57216e+07	9.81545e+06
20210109_QEF1_HILIC_K562_4buffers_repeat_BP683	Buffer B			1.34074e+06	1.25831e+07			1.51701e+06	825710	3.88212e+07	1.59946e+07			1.11632e+07	1.27564e+09	1.46115e+06	1.72956e+07	5.74123e+06	3.49679e+07	1.73049e+07	96774.2	3.6196e+06	4.13541e+08	1.12215e+07	2.5477e+06		5.06671e+06	7.0011e+07	171718	2.53232e+08	1.3032e+09	7.00848e+06	3.9188e+06	1.00235e+08	3.02023e+07	9.45756e+07	3.09554e+07	3.95683e+06	1.08797e+08	1.08227e+09	3.64459e+07	1.62422e+08	3.97698e+08	797074	2.23327e+09	7.39363e+06	773725	3.16312e+07	7.42745e+06
20210109_QEF1_HILIC_K562_4buffers_repeat_BP684	Buffer B			2.67572e+06	1.602e+07			2.82137e+06	1.56172e+06	8.65423e+07	2.78986e+07			2.03864e+07	2.79593e+09	2.63999e+06	3.80061e+07	8.57883e+06	8.97535e+07	4.17866e+07	253346	1.62426e+06	6.92946e+08	2.06383e+07	6.92506e+06		1.03466e+07	1.5192e+08	354264	2.54998e+08	2.55123e+09	1.84012e+07	8.59942e+06	2.04282e+08	2.449e+07	1.55738e+08	6.36734e+07	1.02915e+07	2.36542e+08	2.3587e+09	7.86161e+07	3.7991e+08	8.97351e+08	2.07287e+06	4.89654e+09	1.57729e+07	1.60986e+06	6.77546e+07	1.79298e+07
20210109_QEF1_HILIC_K562_4buffers_repeat_BP685	Buffer B			2.63836e+06	1.70046e+07			2.58197e+06	1.6821e+06	7.9124e+07	6.36465e+07		673833	2.09165e+07	2.69546e+09	2.61829e+06	3.48014e+07	9.91971e+06	3.11897e+07	6.96512e+07	236903	4.1957e+06	6.7494e+08	1.77703e+07	4.75119e+06		1.0182e+07	1.37979e+08	489185	2.43185e+08	2.76767e+09	1.59774e+07	7.884e+06	2.05921e+08	2.14059e+07	1.43916e+08	6.90181e+07	2.63918e+07	2.44513e+08	2.22479e+09	6.58925e+07	3.46842e+08	8.31744e+08	1.8941e+06	4.80382e+09	1.79162e+07	3.29618e+06	7.42191e+07	2.06322e+07
20210109_QEF1_HILIC_K562_4buffers_repeat_BP686	Buffer B			5.99051e+06	3.04534e+07			6.49773e+06	3.96696e+06	1.83035e+08	1.63312e+08	115323	2.27813e+06	3.36246e+07	6.69442e+09	5.85281e+06	9.44748e+07	2.28035e+07	4.00102e+08	1.79652e+08	669441		1.17758e+09	5.20071e+07	1.31211e+07		1.95343e+07	4.9531e+08	1.7623e+06	1.94612e+08	4.69546e+09	4.56037e+07	1.93745e+07	5.25985e+08	1.21027e+07	1.85783e+08	1.69248e+08	5.37507e+07	5.23593e+08	5.729e+09	1.71472e+08	9.71343e+08	2.27213e+09	4.97172e+06	1.21152e+10	2.77451e+07	5.62925e+06	1.45695e+08	8.2855e+07
20210109_QEF1_HILIC_K562_4buffers_repeat_BP687	Buffer B			6.50678e+06	3.41705e+07			7.54381e+06	3.55889e+06	1.96876e+08	1.17515e+08	192870	1.10102e+06	4.08576e+07	7.31818e+09	7.01758e+06	9.11744e+07	2.30269e+07	2.46576e+08	1.49442e+08	689635		1.34363e+09	4.74133e+07	1.43037e+07		2.22816e+07	4.9542e+08	1.38938e+06	1.91705e+08	4.74154e+09	5.25852e+07	2.0394e+07	5.46831e+08	1.30451e+07	2.01522e+08	1.92513e+08	3.01531e+07	5.60588e+08	6.41814e+09	1.84123e+08	1.04385e+09	2.50088e+09	5.67228e+06	1.29721e+10	2.92255e+07	4.46039e+06	1.62716e+08	7.41035e+07
20210109_QEF1_HILIC_K562_4buffers_repeat_BP688	Buffer C	210558		1.05655e+06	1.06536e+09	2.46896e+06	5.19217e+07	1.61078e+06	525331	2.47176e+07	1.37874e+07		2.43206e+06	8.86163e+06	9.94483e+08	2.0603e+06	8.51958e+06	3.01603e+07	52938.6	6.29848e+07		6.32489e+06	2.89749e+08		1.85102e+06	493811	1.30461e+07	5.09628e+07		3.4196e+08	1.08347e+09	6.23555e+06	2.09747e+08	9.07128e+07	5.41497e+06	1.50661e+07	1.66559e+07	8.68168e+07	9.44281e+07	8.44183e+08	3.07469e+07	1.3695e+08	3.28458e+08	580276	1.76123e+09	3.82219e+06	2.76132e+06	3.77683e+07	1.18969e+07
20210109_QEF1_HILIC_K562_4buffers_repeat_BP689	Buffer C	226247		1.06687e+06	1.29346e+09	2.80876e+06	5.00034e+07	1.28671e+06	508583	2.43696e+07	1.2187e+07		2.47117e+06	1.15077e+07	1.06108e+09	2.40007e+06	7.95713e+06	4.79137e+07	1.49702e+06	5.33199e+07		7.97751e+06	3.17668e+08		1.77617e+06	417440	1.63384e+07	5.36084e+07	269849	3.36928e+08	1.00594e+09	7.02269e+06	2.42379e+08	8.88601e+07	6.22373e+06	1.5822e+07	1.79762e+07	5.15898e+07	1.0432e+08	8.98202e+08	3.02529e+07	1.42154e+08	3.55441e+08	615243	1.92119e+09	4.25437e+06	2.38758e+06	3.49772e+07	1.12422e+07
20210109_QEF1_HILIC_K562_4buffers_repeat_BP690	Buffer C	642787	1.91565e+07	2.72025e+06	2.13867e+09	2.45507e+06	5.81203e+07	2.27525e+06	1.41572e+06	7.54886e+07	3.08383e+07		7.43053e+06	1.81098e+07	2.35699e+09	4.04942e+06	1.40593e+07	7.45508e+07	293318	1.68459e+08		6.93097e+06	5.86456e+08		4.45232e+06	565486	1.55579e+07	1.19462e+08	985923	3.42158e+08	2.14478e+09	1.46861e+07	2.579e+08	1.92499e+08	6.74362e+06	3.68483e+07	3.89301e+07	1.90884e+08	2.05944e+08	2.01568e+09	7.37718e+07	3.28236e+08	7.74464e+08	1.87242e+06	4.06896e+09	1.01113e+07	7.17112e+06	7.75376e+07	2.85385e+07
20210109_QEF1_HILIC_K562_4buffers_repeat_BP691	Buffer C	579927		2.71949e+06	2.67266e+09	2.17221e+06	6.37522e+07	2.47077e+06	1.25135e+06	7.91941e+07	2.64054e+07	447352	7.72636e+06	2.01089e+07	2.41736e+09	3.06889e+06	1.53906e+07	2.41547e+07	621363	1.4319e+08		7.52531e+06	6.41631e+08		6.19669e+06	621082	1.65014e+07	1.07025e+08	793082	3.57007e+08	2.16409e+09	1.75894e+07	3.73868e+08	1.83498e+08	7.44104e+06	4.26803e+07	4.43021e+07	1.25603e+08	2.20922e+08	2.12095e+09	6.98206e+07	3.25626e+08	7.81768e+08	1.78028e+06	4.38216e+09	1.24774e+07	7.33043e+06	6.70307e+07	2.89298e+07
20210109_QEF1_HILIC_K562_4buffers_repeat_BP692	Buffer C	2.05625e+06		7.15525e+06	1.76687e+09	4.5283e+06	6.20848e+07	6.52109e+06	3.44896e+06	1.67542e+08	9.75404e+07		2.68888e+07	3.39806e+07	7.15842e+09	7.5599e+06	4.24639e+07	1.04145e+08	897637	5.35685e+08	582761	5.00536e+06	1.18951e+09	2.2789e+06	1.10981e+07	1.25521e+06	2.16098e+07	4.60966e+08	2.3515e+06	3.0611e+08	4.62965e+09	4.15953e+07	1.88601e+08	5.37476e+08	8.06701e+06	1.00609e+08	1.27325e+08	5.7232e+08	5.43995e+08	6.21357e+09	2.13379e+08	1.08993e+09	2.41828e+09	6.29381e+06	1.23638e+10	1.97539e+07	2.43784e+07	1.83024e+08	8.68069e+07
20210109_QEF1_HILIC_K562_4buffers_repeat_BP693	Buffer C	1.33939e+06	5.82561e+07	6.95108e+06	2.21749e+09	4.6937e+06	6.56144e+07	6.91933e+06	3.58461e+06	1.81242e+08	8.35622e+07		2.52185e+07	4.02095e+07	7.38127e+09	8.43636e+06	4.24172e+07	1.22632e+08	1.86774e+06	4.42858e+08	425730	4.67973e+06	1.24138e+09	1.68764e+06	1.15446e+07	1.50009e+06	2.48014e+07	4.76754e+08	2.89547e+06	3.21693e+08	4.82354e+09	4.1659e+07	2.15469e+08	5.38375e+08	7.96522e+06	1.04156e+08	1.3638e+08	3.24864e+08	5.61712e+08	6.46304e+09	2.08238e+08	1.07834e+09	2.46015e+09	6.08247e+06	1.23433e+10	2.33549e+07	2.01884e+07	1.73532e+08	8.6453e+07
20210109_QEF1_HILIC_K562_4buffers_repeat_BP694	Buffer C + Ellmans	252006			1.64747e+09	1.47284e+06	4.27879e+07		270519	3.66249e+07	1.04314e+07		2.78252e+06	1.21625e+07	9.47844e+08	3.54936e+06	8.53498e+06	4.32163e+07	2.85959e+06	5.49577e+07		6.39872e+06	2.94884e+08		3.13813e+06		1.39051e+07	4.98738e+07	323569	3.17757e+08	1.11257e+09	6.18411e+06	8.26336e+07	9.0058e+07	5.49528e+06	1.8317e+07	1.56355e+07	7.11491e+07	9.45487e+07	8.58819e+08	1.78373e+07	1.2253e+08	3.02409e+08	656001	1.72236e+09	4.10295e+06	2.38802e+06	3.57584e+07	1.02809e+07
20210109_QEF1_HILIC_K562_4buffers_repeat_BP695	Buffer C + Ellmans	245292			1.62558e+09	1.92986e+06	4.0375e+07		501358	3.20234e+07	1.4634e+07		3.03089e+06	1.20415e+07	9.90927e+08	2.35943e+06	9.61152e+06	4.05467e+07	2.6275e+06	6.04999e+07		6.55301e+06	3.1877e+08		2.56207e+06		1.31554e+07	5.8003e+07	387632	3.39094e+08	1.08464e+09	7.23938e+06	1.26303e+08	9.30217e+07	5.66837e+06	1.62531e+07	1.64161e+07	7.22955e+07	9.67791e+07	8.79522e+08	1.87374e+07	1.3652e+08	3.28735e+08	765617	1.81235e+09	4.33109e+06	2.95765e+06	3.6429e+07	1.23703e+07
20210109_QEF1_HILIC_K562_4buffers_repeat_BP696	Buffer C + Ellmans	691619	5.54539e+07		2.48434e+09	1.88242e+06	5.19315e+07	1.98975e+06	1.01761e+06	8.73041e+07	3.27206e+07		8.18776e+06	2.34247e+07	2.28724e+09	3.2247e+06	1.4321e+07	8.6511e+07	6.29089e+06	1.53132e+08		7.68718e+06	6.07234e+08		6.18719e+06		1.57772e+07	1.45592e+08	886961	3.49011e+08	2.07993e+09	1.89989e+07	2.14505e+08	2.07052e+08	6.84291e+06	3.95035e+07	4.05735e+07	1.72066e+08	2.16054e+08	1.99036e+09	4.67223e+07	3.22727e+08	7.94514e+08	1.89093e+06	4.23165e+09	9.30235e+06	7.02332e+06	7.14849e+07	2.76251e+07
20210109_QEF1_HILIC_K562_4buffers_repeat_BP697	Buffer C + Ellmans	526738	3.03397e+07		2.45374e+09	2.65637e+06	5.30835e+07	1.49731e+06	821820	7.60011e+07	3.2138e+07		7.65694e+06	1.9821e+07	2.16915e+09	3.86649e+06	1.67239e+07	7.37425e+07	6.59029e+06	1.50938e+08		7.0566e+06	5.89729e+08		6.06045e+06		1.66585e+07	1.3687e+08	829748	3.83046e+08	2.16793e+09	1.78395e+07	2.09593e+08	2.07345e+08	7.72009e+06	3.85995e+07	3.89608e+07	1.976e+08	2.19568e+08	1.93841e+09	4.65084e+07	3.09846e+08	7.55562e+08	1.75243e+06	4.07566e+09	9.47239e+06	7.10078e+06	6.86293e+07	2.43058e+07
20210109_QEF1_HILIC_K562_4buffers_repeat_BP698	Buffer C + Ellmans	2.0372e+06	1.00092e+08		3.09817e+09	1.90856e+06	7.0903e+07	6.14579e+06	3.68463e+06	2.23773e+08	8.52581e+07	657844	2.46588e+07	4.1572e+07	6.63497e+09	7.80414e+06	4.47792e+07	1.5817e+08	2.27455e+07	4.07163e+08	454492	4.10166e+06	1.29498e+09	1.71024e+06	1.7132e+07		2.18786e+07	4.83416e+08	2.48582e+06	3.16747e+08	4.58877e+09	5.22018e+07	4.45635e+08	5.2804e+08	7.65932e+06	9.46009e+07	1.24833e+08	3.51873e+08	5.51401e+08	5.74369e+09	1.42098e+08	9.55513e+08	2.24772e+09	6.49069e+06	1.16104e+10	2.20334e+07	2.02086e+07	1.68561e+08	8.76652e+07
20210109_QEF1_HILIC_K562_4buffers_repeat_BP699	Buffer C + Ellmans	2.4197e+06	1.07508e+08		2.85651e+09	1.93322e+06	5.82527e+07	5.65698e+06	3.4512e+06	2.12781e+08	8.43287e+07	1.15684e+06	2.42288e+07	4.03399e+07	6.50246e+09	6.56856e+06	3.9909e+07	2.14464e+08	2.37027e+07	3.99074e+08	466129	3.67299e+06	1.15516e+09	1.61798e+06	1.53129e+07		2.69755e+07	4.75182e+08	3.06127e+06	3.0037e+08	4.69002e+09	4.80733e+07	4.46233e+08	5.06277e+08	7.64437e+06	9.74285e+07	1.29837e+08	3.2035e+08	5.60391e+08	5.92041e+09	1.32962e+08	9.36555e+08	2.22183e+09	6.50389e+06	1.19091e+10	2.28979e+07	1.96018e+07	1.54739e+08	7.58664e+07
[truncated: 133 more columns]

## Sheet: sample key
File name	Sa millionple	Extraction buffer	Chromatography
20210109_QEF1_HILIC_K562_4buffers_repeat_BP676	1 million cells	Buffer A	ZIC-HILIC
20210109_QEF1_HILIC_K562_4buffers_repeat_BP677	1 million cells	Buffer A**	ZIC-HILIC		** contamination with buffer C+Ellmans
20210109_QEF1_HILIC_K562_4buffers_repeat_BP678	2 million cells	Buffer A	ZIC-HILIC
20210109_QEF1_HILIC_K562_4buffers_repeat_BP679	2 million cells	Buffer A	ZIC-HILIC
20210109_QEF1_HILIC_K562_4buffers_repeat_BP680	5 million cells	Buffer A	ZIC-HILIC
20210109_QEF1_HILIC_K562_4buffers_repeat_BP681	5 million cells	Buffer A	ZIC-HILIC
20210109_QEF1_HILIC_K562_4buffers_repeat_BP682	1 million cells	Buffer B	ZIC-HILIC
20210109_QEF1_HILIC_K562_4buffers_repeat_BP683	1 million cells	Buffer B	ZIC-HILIC
20210109_QEF1_HILIC_K562_4buffers_repeat_BP684	2 million cells	Buffer B	ZIC-HILIC
20210109_QEF1_HILIC_K562_4buffers_repeat_BP685	2 million cells	Buffer B	ZIC-HILIC
20210109_QEF1_HILIC_K562_4buffers_repeat_BP686	5 million cells	Buffer B	ZIC-HILIC
20210109_QEF1_HILIC_K562_4buffers_repeat_BP687	5 million cells	Buffer B	ZIC-HILIC
20210109_QEF1_HILIC_K562_4buffers_repeat_BP688	1 million cells	Buffer C	ZIC-HILIC
20210109_QEF1_HILIC_K562_4buffers_repeat_BP689	1 million cells	Buffer C	ZIC-HILIC
20210109_QEF1_HILIC_K562_4buffers_repeat_BP690	2 million cells	Buffer C	ZIC-HILIC
20210109_QEF1_HILIC_K562_4buffers_repeat_BP691	2 million cells	Buffer C	ZIC-HILIC
20210109_QEF1_HILIC_K562_4buffers_repeat_BP692	5 million cells	Buffer C	ZIC-HILIC
20210109_QEF1_HILIC_K562_4buffers_repeat_BP693	5 million cells	Buffer C	ZIC-HILIC
20210109_QEF1_HILIC_K562_4buffers_repeat_BP694	1 million cells	Buffer C + Ellmans	ZIC-HILIC
20210109_QEF1_HILIC_K562_4buffers_repeat_BP695	1 million cells	Buffer C + Ellmans	ZIC-HILIC
20210109_QEF1_HILIC_K562_4buffers_repeat_BP696	2 million cells	Buffer C + Ellmans	ZIC-HILIC
20210109_QEF1_HILIC_K562_4buffers_repeat_BP697	2 million cells	Buffer C + Ellmans	ZIC-HILIC
20210109_QEF1_HILIC_K562_4buffers_repeat_BP698	5 million cells	Buffer C + Ellmans	ZIC-HILIC
20210109_QEF1_HILIC_K562_4buffers_repeat_BP699	5 million cells	Buffer C + Ellmans	ZIC-HILIC
20210109_QEF1_HILIC_K562_4buffers_repeat_BP700_pool1x	pool 676-699		ZIC-HILIC
20210109_QEF1_HILIC_K562_4buffers_repeat_BP701_pool03x	pool 676-699 1/3 dlution		ZIC-HILIC
20210109_QEF1_HILIC_K562_4buffers_repeat_BP702_pool01x	pool 676-699 1/10 dlution		ZIC-HILIC
